# Supplementary material
Source: PubMed Central journal article supplement (PMC2900863)
Supplement: ddn023_1.pdf [file ddn023_1.pdf]

## **SUPPLEMENTARY MATERIALS**

### **Variations in the Progranulin Gene Affect Global Gene Expression in Frontotemporal Lobar Degeneration**

**Supplementary Table 1. Transcripts showing differential expression in FTL-D-U compared to normal controls.**

| ID          | P.Value  | FC (Dis/Norm) | Gene Symbol | Gene Name                                                                 |
|-------------|----------|---------------|-------------|---------------------------------------------------------------------------|
| 209292_at   | 4.36E-06 | 4.5806        | ID4         | INHIBITOR OF DNA BINDING 4, DOMINANT NEGATIVE HELIX-LOOP-HELIX PROTEIN    |
| 204719_at   | 1.36E-05 | 4.5518        | ABCA8       | ATP-BINDING CASSETTE, SUB-FAMILY A (ABC1), MEMBER 8                       |
| 221841_s_at | 1.92E-05 | 4.2471        | KLF4        | KRUPPEL-LIKE FACTOR 4 (GUT)                                               |
| 206101_at   | 4.23E-04 | 4.1557        | ECM2        | EXTRACELLULAR MATRIX PROTEIN 2, FEMALE ORGAN AND ADIPOCYTE SPECIFIC       |
| 209047_at   | 3.76E-04 | 4.1472        | AQP1        | AQUAPORIN 1 (COLTON BLOOD GROUP)                                          |
| 205856_at   | 4.33E-04 | 4.0672        | SLC14A1     | SOLUTE CARRIER FAMILY 14 (UREA TRANSPORTER), MEMBER 1 (KIDD BLOOD GROU... |
| 208451_s_at | 3.50E-05 | 4.0529        | C4A/C4B     | COMPLEMENT COMPONENT 4A (RODGERS BLOOD GROUP)                             |
| 205907_s_at | 4.59E-04 | 4.0307        | OMD         | OSTEOMODULIN                                                              |
| 211896_s_at | 1.05E-04 | 3.8509        | DCN         | DECORIN                                                                   |
| 205608_s_at | 2.47E-06 | 3.6276        | ANGPT1      | ANGIOPOIETIN 1                                                            |
| 209335_at   | 5.73E-04 | 3.4846        | DCN         | DECORIN                                                                   |
| 214428_x_at | 1.81E-04 | 3.3938        | C4A/C4B     | COMPLEMENT COMPONENT 4A (RODGERS BLOOD GROUP)                             |
| 211813_x_at | 2.04E-04 | 3.1688        | DCN         | DECORIN                                                                   |
| 207542_s_at | 3.87E-04 | 3.1580        | AQP1        | AQUAPORIN 1 (COLTON BLOOD GROUP)                                          |
| 218418_s_at | 1.36E-05 | 3.1493        | ANKRD25     | ANKYRIN REPEAT DOMAIN 25                                                  |
| 204457_s_at | 9.84E-04 | 3.1478        | GAS1        | GROWTH ARREST-SPECIFIC 1                                                  |
| 201893_x_at | 2.23E-04 | 3.1145        | DCN         | DECORIN                                                                   |
| 217678_at   | 4.70E-04 | 3.0599        | SLC7A11     | SOLUTE CARRIER FAMILY 7, (CATIONIC AMINO ACID TRANSPORTER, Y+ SYSTEM) ... |
| 213110_s_at | 5.25E-05 | 3.0167        | COL4A5      | COLLAGEN, TYPE IV, ALPHA 5 (ALPORT SYNDROME)                              |
| 213592_at   | 8.44E-04 | 3.0154        | AGTRL1      | ANGIOTENSIN II RECEPTOR-LIKE 1                                            |
| 215646_s_at | 7.38E-06 | 2.9871        | CSPG2       | CHONDROITIN SULFATE PROTEOGLYCAN 2 (VERSICAN)                             |
| 203042_at   | 3.14E-05 | 2.9759        | LAMP2       | LYSOSOMAL-ASSOCIATED MEMBRANE PROTEIN 2                                   |
| 218901_at   | 2.09E-04 | 2.9630        | PLSCR4      | PHOSPHOLIPID SCRAMBLASE 4                                                 |
| 218162_at   | 2.71E-04 | 2.9477        | OLFML3      | OLFACTOMEDIN-LIKE 3                                                       |
| 218236_s_at | 1.26E-04 | 2.9247        | PRKD3       | PROTEIN KINASE D3                                                         |
| 211571_s_at | 1.78E-05 | 2.9168        | CSPG2       | CHONDROITIN SULFATE PROTEOGLYCAN 2 (VERSICAN)                             |
| 201525_at   | 2.92E-07 | 2.9138        | APOD        | APOLIPOPROTEIN D                                                          |
| 203799_at   | 4.62E-05 | 2.8994        | CD302       | CD302 ANTIGEN                                                             |
| 201427_s_at | 1.56E-04 | 2.8754        | SEPP1       | SELENOPROTEIN P, PLASMA, 1                                                |
| 211538_s_at | 1.60E-04 | 2.8710        | HSPA2       | HEAT SHOCK 70KDA PROTEIN 2                                                |
| 213388_at   | 8.74E-05 | 2.8569        | PDE4DIP     | PHOSPHODIESTERASE 4D INTERACTING PROTEIN (MYOMEGALIN)                     |
| 210473_s_at | 3.93E-05 | 2.8472        | GPR125      | G PROTEIN-COUPLED RECEPTOR 125                                            |
| 221731_x_at | 7.29E-05 | 2.7808        | CSPG2       | CHONDROITIN SULFATE PROTEOGLYCAN 2 (VERSICAN)                             |
| 204963_at   | 3.82E-05 | 2.7622        | SSPN        | SARCOSPAN (KRAS ONCOGENE-ASSOCIATED GENE)                                 |
| 204620_s_at | 7.32E-05 | 2.7428        | CSPG2       | CHONDROITIN SULFATE PROTEOGLYCAN 2 (VERSICAN)                             |
| 209988_s_at | 6.47E-04 | 2.7323        | ASCL1       | ACHAETE-SCUTE COMPLEX-LIKE 1 (DROSOPHILA)                                 |

|             |          |        |         |                                                                           |
|-------------|----------|--------|---------|---------------------------------------------------------------------------|
| 204223_at   | 2.08E-04 | 2.7064 | PRELP   | PROLINE/ARGININE-RICH END LEUCINE-RICH REPEAT PROTEIN                     |
| 209369_at   | 4.93E-04 | 2.7027 | ANXA3   | ANNEXIN A3                                                                |
| 206100_at   | 8.47E-04 | 2.6914 | CPM     | CARBOXYPEPTIDASE M                                                        |
| 213397_x_at | 1.26E-04 | 2.6885 | RNASE4  | RIBONUCLEASE, RNASE A FAMILY, 4                                           |
| 202295_s_at | 4.36E-05 | 2.6862 | CTSH    | CATHEPSIN H                                                               |
| 203041_s_at | 1.26E-04 | 2.6765 | LAMP2   | LYSOSOMAL-ASSOCIATED MEMBRANE PROTEIN 2                                   |
| 200665_s_at | 1.73E-04 | 2.6635 | SPARC   | SECRETED PROTEIN, ACIDIC, CYSTEINE-RICH (OSTEONECTIN)                     |
| 218706_s_at | 2.94E-04 | 2.6610 | GRAMD3  | GRAM DOMAIN CONTAINING 3                                                  |
| 204731_at   | 2.82E-04 | 2.6556 | TGFBR3  | TRANSFORMING GROWTH FACTOR, BETA RECEPTOR III (BETAGLYCAN, 300KDA)        |
| 205932_s_at | 3.70E-04 | 2.6328 | MSX1    | MSH HOMEBOX HOMOLOG 1 (DROSOPHILA)                                        |
| 204273_at   | 7.15E-04 | 2.6075 | EDNRB   | ENDOTHELIN RECEPTOR TYPE B                                                |
| 213056_at   | 3.40E-04 | 2.5928 | FRMD4B  | FERM DOMAIN CONTAINING 4B                                                 |
| 212077_at   | 7.10E-04 | 2.5917 | CALD1   | CALDESMON 1                                                               |
| 205577_at   | 5.11E-05 | 2.5914 | PYGM    | PHOSPHORYLASE, GLYCOGEN; MUSCLE (MCARDLE SYNDROME, GLYCOGEN STORAGE DI... |
| 210906_x_at | 1.11E-04 | 2.5777 | AQP4    | AQUAPORIN 4                                                               |
| 202085_at   | 7.75E-05 | 2.5525 | TJP2    | TIGHT JUNCTION PROTEIN 2 (ZONA OCCLUDENS 2)                               |
| 205173_x_at | 1.96E-04 | 2.5469 | CD58    | CD58 ANTIGEN, (LYMPHOCYTE FUNCTION-ASSOCIATED ANTIGEN 3)                  |
| 201792_at   | 5.05E-04 | 2.5425 | AEBP1   | AE BINDING PROTEIN 1                                                      |
| 211986_at   | 5.28E-04 | 2.5188 | AHNAK   | AHNAK NUCLEOPROTEIN (DESMOYOKIN)                                          |
| 209108_at   | 2.49E-05 | 2.5187 | TSPAN6  | TETRASPANIN 6                                                             |
| 219167_at   | 3.31E-04 | 2.5041 | RASL12  | RAS-LIKE, FAMILY 12                                                       |
| 203903_s_at | 6.21E-05 | 2.5016 | HEPH    | HEPHAESTIN                                                                |
| 209154_at   | 5.21E-05 | 2.4842 | TAX1BP3 | TAX1 (HUMAN T-CELL LEUKEMIA VIRUS TYPE I) BINDING PROTEIN 3               |
| 201667_at   | 2.12E-04 | 2.4832 | GJA1    | GAP JUNCTION PROTEIN, ALPHA 1, 43KDA (CONNEXIN 43)                        |
| 205316_at   | 6.14E-04 | 2.4658 | SLC15A2 | SOLUTE CARRIER FAMILY 15 (H+/PEPTIDE TRANSPORTER), MEMBER 2               |
| 221950_at   | 7.40E-05 | 2.4650 | EMX2    | EMPTY SPIRACLES HOMOLOG 2 (DROSOPHILA)                                    |
| 213075_at   | 2.81E-04 | 2.4551 | OLFML2A | OLFACTOMEDIN-LIKE 2A                                                      |
| 209987_s_at | 7.77E-04 | 2.4464 | ASCL1   | ACHAETE-SCUTE COMPLEX-LIKE 1 (DROSOPHILA)                                 |
| 209348_s_at | 2.68E-05 | 2.4430 | MAF     | V-MAF MUSCULOAPONEUROTIC FIBROSARCOMA ONCOGENE HOMOLOG (AVIAN)            |
| 204619_s_at | 3.57E-04 | 2.4001 | CSPG2   | CHONDROITIN SULFATE PROTEOGLYCAN 2 (VERSICAN)                             |
| 201753_s_at | 8.62E-04 | 2.3951 | ADD3    | ADDUCIN 3 (GAMMA)                                                         |
| 214203_s_at | 8.81E-05 | 2.3739 | PRODH   | PROLINE DEHYDROGENASE (OXIDASE) 1                                         |
| 221024_s_at | 2.94E-04 | 2.3709 | SLC2A10 | SOLUTE CARRIER FAMILY 2 (FACILITATED GLUCOSE TRANSPORTER), MEMBER 10      |
| 209651_at   | 8.48E-04 | 2.3697 | TGFB111 | TRANSFORMING GROWTH FACTOR BETA 1 INDUCED TRANSCRIPT 1                    |
| 211959_at   | 6.01E-04 | 2.3669 | IGFBP5  | INSULIN-LIKE GROWTH FACTOR BINDING PROTEIN 5                              |
| 214129_at   | 9.25E-04 | 2.3597 | PDE4DIP | PHOSPHODIESTERASE 4D INTERACTING PROTEIN (MYOMEGALIN)                     |
| 211663_x_at | 1.03E-05 | 2.3553 | PTGDS   | PROSTAGLANDIN D2 SYNTHASE 21KDA (BRAIN)                                   |
| 222240_s_at | 1.20E-04 | 2.3300 | ISYNA1  | MYO-INOSITOL 1-PHOSPHATE SYNTHASE A1                                      |
| 208623_s_at | 9.37E-05 | 2.3293 | VIL2    | VILLIN 2 (EZRIN)                                                          |
| 204646_at   | 7.36E-04 | 2.3222 | DPYD    | DIHYDROPYRIMIDINE DEHYDROGENASE                                           |

|             |          |        |          |                                                                           |
|-------------|----------|--------|----------|---------------------------------------------------------------------------|
| 212667_at   | 5.19E-04 | 2.3207 | SPARC    | SECRETED PROTEIN, ACIDIC, CYSTEINE-RICH (OSTEONECTIN)                     |
| 211967_at   | 7.18E-04 | 2.3163 | TMEM123  | TRANSMEMBRANE PROTEIN 123                                                 |
| 212522_at   | 4.78E-04 | 2.3104 | PDE8A    | PHOSPHODIESTERASE 8A                                                      |
| 209656_s_at | 2.02E-05 | 2.2966 | TMEM47   | TRANSMEMBRANE PROTEIN 47                                                  |
| 205957_at   | 3.04E-05 | 2.2851 | PLXNB3   | PLEXIN B3                                                                 |
| 202036_s_at | 6.91E-04 | 2.2730 | SFRP1    | SECRETED FRIZZLED-RELATED PROTEIN 1                                       |
| 204400_at   | 2.13E-04 | 2.2651 | EFS      | EMBRYONAL FYN-ASSOCIATED SUBSTRATE                                        |
| 205609_at   | 6.49E-04 | 2.2634 | ANGPT1   | ANGIOPOIETIN 1                                                            |
| 203705_s_at | 5.75E-04 | 2.2616 | FZD7     | FRIZZLED HOMOLOG 7 (DROSOPHILA)                                           |
| 202661_at   | 1.33E-04 | 2.2614 | ITPR2    | INOSITOL 1,4,5-TRIPHOSPHATE RECEPTOR, TYPE 2                              |
| 215073_s_at | 3.79E-04 | 2.2382 | NR2F2    | NUCLEAR RECEPTOR SUBFAMILY 2, GROUP F, MEMBER 2                           |
| 212262_at   | 1.27E-04 | 2.2222 | QKI      | QUAKING HOMOLOG, KH DOMAIN RNA BINDING (MOUSE)                            |
| 218304_s_at | 4.89E-04 | 2.2150 | OSBPL11  | HYPOTHETICAL PROTEIN FLJ13164                                             |
| 214433_s_at | 5.29E-04 | 2.2097 | SELENBP1 | SELENIUM BINDING PROTEIN 1                                                |
| 202724_s_at | 4.60E-05 | 2.2094 | FOXO1A   | FORKHEAD BOX O1A (RHABDOMYOSARCOMA)                                       |
| 219895_at   | 1.69E-04 | 2.2044 | FAM70A   | FAMILY WITH SEQUENCE SIMILARITY 70, MEMBER A                              |
| 213392_at   | 6.40E-05 | 2.1965 | MGC35048 | HYPOTHETICAL PROTEIN MGC35048                                             |
| 203295_s_at | 1.61E-05 | 2.1918 | ATP1A2   | ATPASE, NA+/K+ TRANSPORTING, ALPHA 2 (+) POLYPEPTIDE                      |
| 209341_s_at | 2.61E-04 | 2.1860 | IKBKB    | INHIBITOR OF KAPPA LIGHT POLYPEPTIDE GENE ENHANCER IN B-CELLS, KINASE ... |
| 219304_s_at | 9.15E-04 | 2.1815 | PDGFD    | PLATELET DERIVED GROWTH FACTOR D                                          |
| 212698_s_at | 3.94E-04 | 2.1793 | 10-Sep   | SEPTIN 10                                                                 |
| 211726_s_at | 6.54E-04 | 2.1768 | FMO2     | FLAVIN CONTAINING MONOOXYGENASE 2                                         |
| 205594_at   | 6.45E-04 | 2.1748 | ZNF652   | ZINC FINGER PROTEIN 652                                                   |
| 221623_at   | 2.94E-04 | 2.1706 | BCAN     | BREVICAN                                                                  |
| 212096_s_at | 5.32E-04 | 2.1677 | MTUS1    | MITOCHONDRIAL TUMOR SUPPRESSOR 1                                          |
| 203704_s_at | 7.47E-04 | 2.1623 | RREB1    | RAS RESPONSIVE ELEMENT BINDING PROTEIN 1                                  |
| 201131_s_at | 5.90E-04 | 2.1607 | CDH1     | CADHERIN 1, TYPE 1, E-CADHERIN (EPITHELIAL)                               |
| 203723_at   | 7.26E-04 | 2.1577 | ITPKB    | INOSITOL 1,4,5-TRISPHOSPHATE 3-KINASE B                                   |
| 204112_s_at | 2.52E-04 | 2.1496 | HNMT     | HISTAMINE N-METHYLTRANSFERASE                                             |
| 201752_s_at | 8.87E-04 | 2.1444 | ADD3     | ADDUCIN 3 (GAMMA)                                                         |
| 218816_at   | 4.08E-04 | 2.1386 | LRRC1    | LEUCINE RICH REPEAT CONTAINING 1                                          |
| 211317_s_at | 3.33E-04 | 2.1307 | CFLAR    | CASP8 AND FADD-LIKE APOPTOSIS REGULATOR                                   |
| 200923_at   | 8.06E-04 | 2.1298 | LGALS3BP | LECTIN, GALACTOSIDE-BINDING, SOLUBLE, 3 BINDING PROTEIN                   |
| 203296_s_at | 3.27E-05 | 2.1293 | ATP1A2   | ATPASE, NA+/K+ TRANSPORTING, ALPHA 2 (+) POLYPEPTIDE                      |
| 212187_x_at | 1.61E-05 | 2.1282 | PTGDS    | PROSTAGLANDIN D2 SYNTHASE 21KDA (BRAIN)                                   |
| 212397_at   | 9.82E-04 | 2.1245 | RDX      | RADIXIN                                                                   |
| 203501_at   | 4.18E-05 | 2.1236 | PGCP     | PLASMA GLUTAMATE CARBOXYPEPTIDASE                                         |
| 202173_s_at | 6.28E-05 | 2.1180 | ZNF161   | ZINC FINGER PROTEIN 161                                                   |
| 209684_at   | 7.72E-04 | 2.1153 | RIN2     | RAS AND RAB INTERACTOR 2                                                  |
| 211748_x_at | 1.43E-05 | 2.1109 | PTGDS    | PROSTAGLANDIN D2 SYNTHASE 21KDA (BRAIN)                                   |
| 204428_s_at | 2.40E-04 | 2.0968 | LCAT     | LECITHIN-CHOLESTEROL ACYLTRANSFERASE                                      |
| 208430_s_at | 2.46E-04 | 2.0922 | DTNA     | DYSTROBREVIN, ALPHA                                                       |
| 208712_at   | 4.69E-04 | 2.0920 | CCND1    | CYCLIN D1                                                                 |

|             |          |        |          |                                                                           |
|-------------|----------|--------|----------|---------------------------------------------------------------------------|
| 205882_x_at | 7.15E-04 | 2.0911 | ADD3     | ADDUCIN 3 (GAMMA)                                                         |
| 213069_at   | 2.22E-05 | 2.0835 | HEG1     | HEG HOMOLOG 1 (ZEBRAFISH)                                                 |
| 218084_x_at | 9.87E-04 | 2.0830 | FXYD5    | FXYD DOMAIN CONTAINING ION TRANSPORT REGULATOR 5                          |
| 221748_s_at | 3.25E-04 | 2.0803 | TNS1     | TENSIN 1                                                                  |
| 201034_at   | 8.27E-04 | 2.0770 | ADD3     | ADDUCIN 3 (GAMMA)                                                         |
| 200821_at   | 1.45E-04 | 2.0762 | LAMP2    | LYSOSOMAL-ASSOCIATED MEMBRANE PROTEIN 2                                   |
| 212122_at   | 5.81E-04 | 2.0712 | RHOQ     | RAS HOMOLOG GENE FAMILY, MEMBER Q                                         |
| 202609_at   | 9.65E-04 | 2.0622 | EPS8     | EPIDERMAL GROWTH FACTOR RECEPTOR PATHWAY SUBSTRATE 8                      |
| 208789_at   | 4.79E-04 | 2.0608 | PTRF     | POLYMERASE I AND TRANSCRIPT RELEASE FACTOR                                |
| 201983_s_at | 6.71E-04 | 2.0572 | EGFR     | EPIDERMAL GROWTH FACTOR RECEPTOR (ERYTHROBLASTIC LEUKEMIA VIRAL (V-ERB... |
| 203845_at   | 9.27E-04 | 2.0518 | PCAF     | P300/CBP-ASSOCIATED FACTOR                                                |
| 218700_s_at | 1.26E-05 | 2.0478 | RAB7L1   | RAB7, MEMBER RAS ONCOGENE FAMILY-LIKE 1                                   |
| 209496_at   | 2.73E-04 | 2.0476 | RARRES2  | RETINOIC ACID RECEPTOR RESPONDER (TAZAROTENE INDUCED) 2                   |
| 206058_at   | 8.31E-04 | 2.0456 | SLC6A12  | SOLUTE CARRIER FAMILY 6 (NEUROTRANSMITTER TRANSPORTER, BETAINE/GABA), ... |
| 209655_s_at | 3.56E-05 | 2.0388 | TMEM47   | TRANSMEMBRANE PROTEIN 47                                                  |
| 213578_at   | 1.87E-04 | 2.0356 | BMPR1A   | BONE MORPHOGENETIC PROTEIN RECEPTOR, TYPE IA                              |
| 218454_at   | 3.34E-04 | 2.0247 | FLJ22662 | HYPOTHETICAL PROTEIN FLJ22662                                             |
| 203540_at   | 7.18E-04 | 2.0241 | GFAP     | GLIAL FIBRILLARY ACIDIC PROTEIN                                           |
| 203932_at   | 9.17E-04 | 2.0232 | HLA-DMB  | MAJOR HISTOCOMPATIBILITY COMPLEX, CLASS II, DM BETA                       |
| 218248_at   | 9.16E-04 | 2.0185 | FAM111A  | FAMILY WITH SEQUENCE SIMILARITY 111, MEMBER A                             |
| 208937_s_at | 6.78E-04 | 2.0158 | ID1      | INHIBITOR OF DNA BINDING 1, DOMINANT NEGATIVE HELIX-LOOP-HELIX PROTEIN    |
| 211862_x_at | 8.22E-04 | 2.0099 | CFLAR    | CASP8 AND FADD-LIKE APOPTOSIS REGULATOR                                   |
| 215807_s_at | 2.71E-05 | 2.0045 | PLXNB1   | PLEXIN B1                                                                 |
|             |          |        |          |                                                                           |
| 213479_at   | 7.64E-04 | 0.1994 | NPTX2    | NEURONAL PENTRAXIN II                                                     |
| 207768_at   | 5.95E-05 | 0.2053 | EGR4     | EARLY GROWTH RESPONSE 4                                                   |
| 206115_at   | 2.67E-05 | 0.2189 | EGR3     | EARLY GROWTH RESPONSE 3                                                   |
| 219697_at   | 3.09E-04 | 0.2375 | HS3ST2   | HEPARAN SULFATE (GLUCOSAMINE) 3-O-SULFOTRANSFERASE 2                      |
| 216086_at   | 1.08E-04 | 0.2523 | SV2C     | SYNAPTIC VESICLE GLYCOPROTEIN 2C                                          |
| 211616_s_at | 3.67E-04 | 0.2825 | HTR2A    | 5-HYDROXYTRYPTAMINE (SEROTONIN) RECEPTOR 2A                               |
| 218625_at   | 3.67E-04 | 0.3156 | NRN1     | NEURITIN 1                                                                |
| 220794_at   | 1.34E-04 | 0.3343 | GREM2    | GREMLIN 2, CYSTEINE KNOT SUPERFAMILY, HOMOLOG (XENOPUS LAEVIS)            |
| 210090_at   | 9.41E-04 | 0.3535 | ARC      | ACTIVITY-REGULATED CYTOSKELETON-ASSOCIATED PROTEIN                        |
| 207135_at   | 8.85E-04 | 0.3617 | HTR2A    | 5-HYDROXYTRYPTAMINE (SEROTONIN) RECEPTOR 2A                               |
| 205586_x_at | 1.51E-04 | 0.3690 | VGF      | VGF NERVE GROWTH FACTOR INDUCIBLE                                         |
| 201693_s_at | 9.81E-04 | 0.3815 | EGR1     | EARLY GROWTH RESPONSE 1                                                   |
| 201694_s_at | 4.98E-04 | 0.3888 | EGR1     | EARLY GROWTH RESPONSE 1                                                   |
| 210227_at   | 1.49E-04 | 0.3997 | DLGAP2   | DISCS, LARGE (DROSOPHILA) HOMOLOG-ASSOCIATED PROTEIN 2                    |
| 206161_s_at | 5.14E-04 | 0.4151 | SYT5     | SYNAPTOTAGMIN V                                                           |
| 204506_at   | 9.89E-04 | 0.4154 | PPP3R1   | PROTEIN PHOSPHATASE 3 (FORMERLY 2B), REGULATORY SUBUNIT B, 19KDA, ALPH... |

|             |          |        |          |                                                                            |
|-------------|----------|--------|----------|----------------------------------------------------------------------------|
| 205721_at   | 2.08E-06 | 0.4201 | GFRA2    | GDNF FAMILY RECEPTOR ALPHA 2                                               |
| 204945_at   | 6.75E-04 | 0.4223 | PTPRN    | PROTEIN TYROSINE PHOSPHATASE, RECEPTOR TYPE, N                             |
| 207548_at   | 5.98E-04 | 0.4246 | GRM7     | GLUTAMATE RECEPTOR, METABOTROPIC 7                                         |
| 214078_at   | 1.63E-04 | 0.4254 | PAK3     | P21 (CDKN1A)-ACTIVATED KINASE 3                                            |
| 221874_at   | 1.89E-04 | 0.4309 | KIAA1324 | KIAA1324                                                                   |
| 59697_at    | 6.90E-05 | 0.4384 | RAB15    | RAB15, MEMBER RAS ONCOGENE FAMILY                                          |
| 205744_at   | 8.39E-04 | 0.4412 | DOC2A    | DOUBLE C2-LIKE DOMAINS, ALPHA                                              |
| 204592_at   | 3.64E-04 | 0.4499 | DLG4     | DISCS, LARGE HOMOLOG 4 (DROSOPHILA)                                        |
| 207869_s_at | 2.45E-04 | 0.4503 | CACNA1G  | CALCIUM CHANNEL, VOLTAGE-DEPENDENT, ALPHA 1G SUBUNIT                       |
| 220246_at   | 2.80E-04 | 0.4508 | CAMK1D   | CALCIUM/CALMODULIN-DEPENDENT PROTEIN KINASE ID                             |
| 208359_s_at | 2.22E-04 | 0.4508 | KCNJ4    | POTASSIUM INWARDLY-RECTIFYING CHANNEL, SUBFAMILY J, MEMBER 4               |
| 205738_s_at | 8.10E-06 | 0.4518 | FABP3    | FATTY ACID BINDING PROTEIN 3, MUSCLE AND HEART (MAMMARY-DERIVED GROWTH...  |
| 212473_s_at | 7.03E-04 | 0.4530 | MICAL2   | MICROTUBULE ASSOCIATED MONOOXYGENASE, CALPONIN AND LIM DOMAIN CONTAININ... |
| 207767_s_at | 4.60E-04 | 0.4570 | EGR4     | EARLY GROWTH RESPONSE 4                                                    |
| 221810_at   | 2.52E-05 | 0.4595 | RAB15    | RAB15, MEMBER RAS ONCOGENE FAMILY                                          |
| 207035_at   | 3.41E-04 | 0.4605 | SLC30A3  | SOLUTE CARRIER FAMILY 30 (ZINC TRANSPORTER), MEMBER 3                      |
| 206281_at   | 1.57E-04 | 0.4657 | ADCYAP1  | ADENYLATE CYCLASE ACTIVATING POLYPEPTIDE 1 (PITUITARY)                     |
| 204513_s_at | 9.65E-04 | 0.4757 | ELMO1    | ENGULFMENT AND CELL MOTILITY 1                                             |
| 204679_at   | 4.10E-04 | 0.4775 | KCNK1    | POTASSIUM CHANNEL, SUBFAMILY K, MEMBER 1                                   |
| 206322_at   | 4.76E-04 | 0.4781 | SYN3     | SYNAPSIN III                                                               |
| 210380_s_at | 8.06E-05 | 0.4799 | CACNA1G  | CALCIUM CHANNEL, VOLTAGE-DEPENDENT, ALPHA 1G SUBUNIT                       |
| 219894_at   | 1.45E-04 | 0.4809 | MAGEL2   | MAGE-LIKE 2                                                                |
| 202178_at   | 8.86E-04 | 0.4823 | PRKCZ    | PROTEIN KINASE C, ZETA                                                     |
| 203911_at   | 4.95E-04 | 0.4841 | RAP1GA1  | RAP1, GTPASE ACTIVATING PROTEIN 1                                          |
| 215010_s_at | 3.51E-04 | 0.4974 | BRSK2    | BR SERINE/THREONINE KINASE 2                                               |
| 212448_at   | 7.25E-05 | 0.4978 | NEDD4L   | NEURAL PRECURSOR CELL EXPRESSED, DEVELOPMENTALLY DOWN-REGULATED 4-LIKE     |
| 207693_at   | 9.09E-04 | 0.4997 | CACNB4   | CALCIUM CHANNEL, VOLTAGE-DEPENDENT, BETA 4 SUBUNIT                         |

16 FTLD-U cases were compared to 8 normal controls on Affymetrix U133A microarrays. A statistical cutoff of  $p < 0.001$  was used to identify genes with differential expression, which were then ranked based on fold change (FC, disease/normal). All genes with fold change  $> 2$ , identified by GeneSymbol and name, are shown for frontal cortex samples.

Supplementary Table 2. Number of gene changes found in present study compared to previous microarray studies of human postmortem cortex samples in neurodegenerative disease.

| <b>Comparison Study</b>                                             | <b>AD<sup>46</sup></b> | <b>sCJD<sup>47</sup></b> | <b>Prior FTLD-U<sup>58</sup></b> | <b>ALS (Cortex)<sup>48</sup></b> |
|---------------------------------------------------------------------|------------------------|--------------------------|----------------------------------|----------------------------------|
| Upregulated probes in comparison study (% Total probes)             | 1572 (7.06%)           | 12 (0.05%)               | 60 (0.13%)                       | 17 (0.09%)                       |
| Downregulated probes in comparison study (% Total probes)           | 1126 (5.05%)           | 275 (1.23%)              | 518 (1.10%)                      | 40 (0.2%)                        |
| Upregulated probes in present study – All FTLD-U (% Total probes)   | 2289 (10.28%)          | 196 (0.88%)              | 321 (1.44%)                      | 57 (0.29%)                       |
| Downregulated probes in present study – All FTLD-U (% Total probes) | 2637 (11.84%)          | 74 (0.33%)               | 282 (1.27%)                      | 210 (0.94%)                      |
| Upregulated probes in present study – GRN+ only (% Total probes)    | 3688 (16.56%)          | 507 (2.28%)              | 658 (2.95%)                      | 579 (2.60%)                      |
| Downregulated probes in present study – GRN+ only (% Total probes)  | 3248 (14.58%)          | 688 (3.09%)              | 767 (3.44%)                      | 732 (3.29%)                      |
| Number of samples                                                   | 22 disease, 9 control  | 15 disease, 5 control    | 6 disease, 6 control             | 11 disease, 9 control            |
| Study size                                                          | Larger than present    | Comparable to present    | Smaller than present             | Comparable to present            |
| Statistics, cutoffs used                                            | Nominal P<0.05         | FDR<5%, FC>2             | Benjamini P<0.05, FC>2           | Benjamini P<0.05, FC>2           |
| Total probes on array                                               | 22,000+                | 22,000+                  | 47,000+                          | 19,431                           |

Using the statistical conditions employed in the comparison study,<sup>46-48, 58</sup> we reanalyzed our frontal cortex dataset. AD = Alzheimer's Disease. sCJD = sporadic Creutzfeldt-Jacob disease. ALS = amyotrophic lateral sclerosis. FDR = false discovery rate. FC = fold change. Benjamini = Benjamini-Hochberg correction for multiple hypothesis testing.

**Supplementary Table 3. Transcripts showing differential expression in *GRN+* FTL-D-U compared to normal controls.**

| ID          | P.Value  | FC     | Gene Symbol | Gene Name                                                                         |
|-------------|----------|--------|-------------|-----------------------------------------------------------------------------------|
| 204719_at   | 9.67E-05 | 6.3989 | ABCA8       | ATP-BINDING CASSETTE, SUB-FAMILY A (ABC1), MEMBER 8                               |
| 205907_s_at | 1.84E-04 | 6.0441 | OMD         | OSTEOMODULIN                                                                      |
| 221841_s_at | 1.12E-04 | 5.6157 | KLF4        | KRUPPEL-LIKE FACTOR 4 (GUT)                                                       |
| 211896_s_at | 6.57E-05 | 5.3074 | DCN         | DECORIN                                                                           |
| 202409_at   | 2.05E-04 | 5.3061 | C11ORF43    | CHROMOSOME 11 OPEN READING FRAME 43                                               |
| 209335_at   | 2.45E-04 | 5.1019 | DCN         | DECORIN                                                                           |
| 209292_at   | 1.28E-04 | 5.0969 | ID4         | INHIBITOR OF DNA BINDING 4, DOMINANT NEGATIVE HELIX-LOOP-HELIX PROTEIN            |
| 206101_at   | 1.83E-04 | 5.0700 | ECM2        | EXTRACELLULAR MATRIX PROTEIN 2, FEMALE ORGAN AND ADIPOCYTE SPECIFIC               |
| 206373_at   | 8.05E-05 | 4.5235 | ZIC1        | ZIC FAMILY MEMBER 1 (ODD-PAIRED HOMOLOG, DROSOPHILA)                              |
| 211742_s_at | 8.28E-05 | 4.4841 | EVI2B       | ECOTROPIC VIRAL INTEGRATION SITE 2B                                               |
| 206100_at   | 3.58E-05 | 4.3504 | CPM         | CARBOXYPEPTIDASE M                                                                |
| 204457_s_at | 9.77E-04 | 4.2875 | GAS1        | GROWTH ARREST-SPECIFIC 1                                                          |
| 211813_x_at | 5.88E-05 | 4.2649 | DCN         | DECORIN                                                                           |
| 201893_x_at | 3.97E-05 | 4.2531 | DCN         | DECORIN                                                                           |
| 213975_s_at | 9.53E-04 | 4.2301 | LILRB1/LYZ  | LEUKOCYTE IMMUNOGLOBULIN-LIKE RECEPTOR, SUBFAMILY B; LYSOZYME (RENAL AMYLOIDOSIS) |
| 205608_s_at | 2.48E-07 | 4.2236 | ANGPT1      | ANGIOPOIETIN 1                                                                    |
| 218418_s_at | 1.60E-06 | 4.2142 | ANKRD25     | ANKYRIN REPEAT DOMAIN 25                                                          |
| 202403_s_at | 4.28E-04 | 4.2031 | COL1A2      | COLLAGEN, TYPE I, ALPHA 2                                                         |
| 208451_s_at | 1.34E-04 | 4.1915 | C4A/C4B     | COMPLEMENT COMPONENT 4A (RODGERS BLOOD GROUP)                                     |
| 203042_at   | 2.14E-05 | 4.1637 | LAMP2       | LYSOSOMAL-ASSOCIATED MEMBRANE PROTEIN 2                                           |
| 203186_s_at | 2.78E-04 | 4.1131 | S100A4      | S100 CALCIUM BINDING PROTEIN A4 (CALCIUM PROTEIN, CALVASCULIN, METASTA...         |
| 220467_at   | 2.76E-04 | 4.0945 | FLJ21272    | HYPOTHETICAL PROTEIN FLJ21272                                                     |
| 213388_at   | 6.10E-05 | 4.0204 | PDE4DIP     | PHOSPHODIESTERASE 4D INTERACTING PROTEIN (MYOMEGALIN)                             |
| 201427_s_at | 1.72E-04 | 3.9315 | SEPP1       | SELENOPROTEIN P, PLASMA, 1                                                        |
| 214428_x_at | 1.51E-04 | 3.9157 | C4A/C4B     | COMPLEMENT COMPONENT 4A (RODGERS BLOOD GROUP)                                     |
| 204324_s_at | 2.10E-04 | 3.8230 | GOLPH4      | GOLGI PHOSPHOPROTEIN 4                                                            |
| 204223_at   | 1.41E-04 | 3.7802 | PRELP       | PROLINE/ARGININE-RICH END LEUCINE-RICH REPEAT PROTEIN                             |
| 49452_at    | 1.90E-04 | 3.7720 | ACACB       | ACETYL-COENZYME A CARBOXYLASE BETA                                                |
| 209369_at   | 6.77E-04 | 3.6915 | ANXA3       | ANNEXIN A3                                                                        |
| 221731_x_at | 4.13E-05 | 3.6023 | CSPG2       | CHONDROITIN SULFATE PROTEOGLYCAN 2 (VERSICAN)                                     |
| 213056_at   | 6.76E-05 | 3.5538 | FRMD4B      | FERM DOMAIN CONTAINING 4B                                                         |
| 221698_s_at | 6.88E-04 | 3.5378 | CLEC7A      | C-TYPE LECTIN DOMAIN FAMILY 7, MEMBER A                                           |
| 213592_at   | 3.73E-04 | 3.5042 | AGTRL1      | ANGIOTENSIN II RECEPTOR-LIKE 1                                                    |
| 215646_s_at | 4.06E-06 | 3.4957 | CSPG2       | CHONDROITIN SULFATE PROTEOGLYCAN 2 (VERSICAN)                                     |
| 201525_at   | 1.95E-06 | 3.4671 | APOD        | APOLIPOPROTEIN D                                                                  |
| 203799_at   | 2.25E-04 | 3.4349 | CD302       | CD302 ANTIGEN                                                                     |
| 206307_s_at | 5.33E-04 | 3.4225 | FOXD1       | FORKHEAD BOX D1                                                                   |
| 217985_s_at | 5.35E-05 | 3.4084 | BAZ1A       | BROMODOMAIN ADJACENT TO ZINC FINGER DOMAIN, 1A                                    |



|             |          |        |         |                                                                           |
|-------------|----------|--------|---------|---------------------------------------------------------------------------|
| 201141_at   | 5.46E-04 | 3.4029 | GPNMB   | GLYCOPROTEIN (TRANSMEMBRANE) NMB                                          |
| 209987_s_at | 8.27E-05 | 3.4005 | ASCL1   | ACHAETE-SCUTE COMPLEX-LIKE 1 (DROSOPHILA)                                 |
| 218236_s_at | 3.73E-04 | 3.4001 | PRKD3   | PROTEIN KINASE D3                                                         |
| 211571_s_at | 7.67E-06 | 3.3984 | CSPG2   | CHONDROITIN SULFATE PROTEOGLYCAN 2 (VERSICAN)                             |
| 218162_at   | 2.91E-04 | 3.3743 | OLFML3  | OLFACTOMEDIN-LIKE 3                                                       |
| 204620_s_at | 4.72E-05 | 3.3659 | CSPG2   | CHONDROITIN SULFATE PROTEOGLYCAN 2 (VERSICAN)                             |
| 203041_s_at | 4.64E-04 | 3.3586 | LAMP2   | LYSOSOMAL-ASSOCIATED MEMBRANE PROTEIN 2                                   |
| 201617_x_at | 7.21E-04 | 3.3145 | CALD1   | CALDESMON 1                                                               |
| 214129_at   | 4.19E-05 | 3.3064 | PDE4DIP | PHOSPHODIESTERASE 4D INTERACTING PROTEIN (MYOMEGALIN)                     |
| 222240_s_at | 2.14E-05 | 3.2787 | ISYNA1  | MYO-INOSITOL 1-PHOSPHATE SYNTHASE A1                                      |
| 213158_at   | 9.53E-04 | 3.2720 | NA      | .CONSENSUS INCLUDES GB:AA045174 /FEA=EST /DB_XREF=GI:1523376 /DB_XREF=    |
| 206637_at   | 1.26E-04 | 3.2580 | P2RY14  | PURINERGIC RECEPTOR P2Y, G-PROTEIN COUPLED, 14                            |
| 203706_s_at | 2.33E-04 | 3.2489 | FZD7    | FRIZZLED HOMOLOG 7 (DROSOPHILA)                                           |
| 217678_at   | 8.91E-04 | 3.2444 | SLC7A11 | SOLUTE CARRIER FAMILY 7, (CATIONIC AMINO ACID TRANSPORTER, Y+ SYSTEM) ... |
| 211986_at   | 3.30E-04 | 3.2028 | AHNAK   | AHNAK NUCLEOPROTEIN (DESMOYOKIN)                                          |
| 213156_at   | 4.82E-04 | 3.1907 | NA      | .CONSENSUS INCLUDES GB:BG251521 /FEA=EST /DB_XREF=GI:12761337 /DB_XREF    |
| 43427_at    | 1.06E-04 | 3.1877 | ACACB   | ACETYL-COENZYME A CARBOXYLASE BETA                                        |
| 205932_s_at | 1.41E-04 | 3.1645 | MSX1    | MSH HOMEBOX HOMOLOG 1 (DROSOPHILA)                                        |
| 220170_at   | 9.85E-04 | 3.1603 | FHL5    | FOUR AND A HALF LIM DOMAINS 5                                             |
| 211726_s_at | 1.08E-04 | 3.1500 | FMO2    | FLAVIN CONTAINING MONOOXYGENASE 2                                         |
| 209154_at   | 2.13E-05 | 3.1065 | TAX1BP3 | TAX1 (HUMAN T-CELL LEUKEMIA VIRUS TYPE I) BINDING PROTEIN 3               |
| 205173_x_at | 3.38E-04 | 3.0995 | CD58    | CD58 ANTIGEN, (LYMPHOCYTE FUNCTION-ASSOCIATED ANTIGEN 3)                  |
| 204646_at   | 8.80E-04 | 3.0937 | DPYD    | DIHYDROPYRIMIDINE DEHYDROGENASE                                           |
| 208965_s_at | 7.91E-04 | 3.0627 | IFI16   | INTERFERON, GAMMA-INDUCIBLE PROTEIN 16                                    |
| 201280_s_at | 4.33E-04 | 3.0537 | DAB2    | DISABLED HOMOLOG 2, MITOGEN-RESPONSIVE PHOSPHOPROTEIN (DROSOPHILA)        |
| 219167_at   | 3.79E-04 | 3.0335 | RASL12  | RAS-LIKE, FAMILY 12                                                       |
| 211959_at   | 7.79E-04 | 3.0239 | IGFBP5  | INSULIN-LIKE GROWTH FACTOR BINDING PROTEIN 5                              |
| 219602_s_at | 9.93E-04 | 3.0221 | FAM38B  | FAMILY WITH SEQUENCE SIMILARITY 38, MEMBER B                              |
| 213075_at   | 1.99E-04 | 3.0112 | OLFML2A | OLFACTOMEDIN-LIKE 2A                                                      |
| 206058_at   | 4.46E-06 | 3.0105 | SLC6A12 | SOLUTE CARRIER FAMILY 6 (NEUROTRANSMITTER TRANSPORTER, BETAINE/GABA), ... |
| 209348_s_at | 1.82E-05 | 2.9977 | MAF     | V-MAF MUSCULOAPONEUROTIC FIBROSARCOMA ONCOGENE HOMOLOG (AVIAN)            |
| 209651_at   | 6.00E-04 | 2.9895 | TGFB1I1 | TRANSFORMING GROWTH FACTOR BETA 1 INDUCED TRANSCRIPT 1                    |
| 204731_at   | 7.49E-04 | 2.9850 | TGFBR3  | TRANSFORMING GROWTH FACTOR, BETA RECEPTOR III (BETAGLYCAN, 300KDA)        |
| 201792_at   | 5.94E-04 | 2.9744 | AEBP1   | AE BINDING PROTEIN 1                                                      |
| 201867_s_at | 7.02E-05 | 2.9644 | TBL1X   | TRANSDUCIN (BETA)-LIKE 1X-LINKED                                          |
| 204619_s_at | 2.24E-04 | 2.9636 | CSPG2   | CHONDROITIN SULFATE PROTEOGLYCAN 2 (VERSICAN)                             |
| 200665_s_at | 4.32E-04 | 2.9576 | SPARC   | SECRETED PROTEIN, ACIDIC, CYSTEINE-RICH (OSTEONECTIN)                     |
| 205594_at   | 2.17E-04 | 2.9567 | ZNF652  | ZINC FINGER PROTEIN 652                                                   |
| 202661_at   | 1.57E-05 | 2.9321 | ITPR2   | INOSITOL 1,4,5-TRIPHOSPHATE RECEPTOR, TYPE 2                              |

|             |          |        |         |                                                                           |
|-------------|----------|--------|---------|---------------------------------------------------------------------------|
| 202085_at   | 8.73E-05 | 2.9248 | TJP2    | TIGHT JUNCTION PROTEIN 2 (ZONA OCCLUDENS 2)                               |
| 221748_s_at | 1.91E-05 | 2.9202 | TNS1    | TENSIN 1                                                                  |
| 217941_s_at | 4.30E-04 | 2.9172 | ERBB2IP | ERBB2 INTERACTING PROTEIN                                                 |
| 207826_s_at | 1.57E-04 | 2.8890 | ID3     | INHIBITOR OF DNA BINDING 3, DOMINANT NEGATIVE HELIX-LOOP-HELIX PROTEIN    |
| 202295_s_at | 3.35E-04 | 2.8597 | CTSH    | CATHEPSIN H                                                               |
| 205098_at   | 8.33E-04 | 2.8587 | CCR1    | CHEMOKINE (C-C MOTIF) RECEPTOR 1                                          |
| 205383_s_at | 4.78E-04 | 2.8548 | ZBTB20  | ZINC FINGER AND BTB DOMAIN CONTAINING 20                                  |
| 202688_at   | 6.20E-04 | 2.8451 | TNFSF10 | TUMOR NECROSIS FACTOR (LIGAND) SUPERFAMILY, MEMBER 10                     |
| 201616_s_at | 3.89E-04 | 2.8307 | CALD1   | CALDESMON 1                                                               |
| 211481_at   | 6.90E-04 | 2.8252 | SLCO1A2 | SOLUTE CARRIER ORGANIC ANION TRANSPORTER FAMILY, MEMBER 1A2               |
| 211317_s_at | 1.06E-04 | 2.8243 | CFLAR   | CASP8 AND FADD-LIKE APOPTOSIS REGULATOR                                   |
| 203704_s_at | 2.56E-04 | 2.8137 | RREB1   | RAS RESPONSIVE ELEMENT BINDING PROTEIN 1                                  |
| 207308_at   | 9.36E-05 | 2.8083 | SLCO1A2 | SOLUTE CARRIER ORGANIC ANION TRANSPORTER FAMILY, MEMBER 1A2               |
| 207655_s_at | 3.82E-04 | 2.8000 | BLNK    | B-CELL LINKER                                                             |
| 209699_x_at | 2.52E-04 | 2.7813 | AKR1C2  | ALDO-KETO REDUCTASE FAMILY 1, MEMBER C2 (DIHYDRODIOL DEHYDROGENASE 2; ... |
| 219777_at   | 1.24E-04 | 2.7726 | GIMAP6  | IMMUNE ASSOCIATED NUCLEOTIDE 2                                            |
| 201830_s_at | 3.43E-05 | 2.7715 | NET1    | NEUROEPITHELIAL CELL TRANSFORMING GENE 1                                  |
| 211862_x_at | 3.32E-05 | 2.7672 | CFLAR   | CASP8 AND FADD-LIKE APOPTOSIS REGULATOR                                   |
| 203723_at   | 4.56E-04 | 2.7640 | ITPKB   | INOSITOL 1,4,5-TRISPHOSPHATE 3-KINASE B                                   |
| 204963_at   | 5.89E-04 | 2.7348 | SSPN    | SARCOSPAN (KRAS ONCOGENE-ASSOCIATED GENE)                                 |
| 218084_x_at | 1.83E-04 | 2.7335 | FXVD5   | FXVD DOMAIN CONTAINING ION TRANSPORT REGULATOR 5                          |
| 208623_s_at | 4.70E-04 | 2.7188 | VIL2    | VILLIN 2 (EZRIN)                                                          |
| 203934_at   | 9.68E-04 | 2.7061 | KDR     | KINASE INSERT DOMAIN RECEPTOR (A TYPE III RECEPTOR TYROSINE KINASE)       |
| 202506_at   | 5.95E-05 | 2.6945 | SSFA2   | SPERM SPECIFIC ANTIGEN 2                                                  |
| 212698_s_at | 4.60E-05 | 2.6792 | 10-Sep  | SEPTIN 10                                                                 |
| 209108_at   | 4.65E-04 | 2.6786 | TSPAN6  | TETRASPANIN 6                                                             |
| 202609_at   | 4.67E-04 | 2.6702 | EPS8    | EPIDERMAL GROWTH FACTOR RECEPTOR PATHWAY SUBSTRATE 8                      |
| 204834_at   | 7.34E-04 | 2.6641 | FGL2    | FIBRINOGEN-LIKE 2                                                         |
| 203932_at   | 2.09E-04 | 2.6616 | HLA-DMB | MAJOR HISTOCOMPATIBILITY COMPLEX, CLASS II, DM BETA                       |
| 209341_s_at | 2.24E-04 | 2.6487 | IKBKB   | INHIBITOR OF KAPPA LIGHT POLYPEPTIDE GENE ENHANCER IN B-CELLS, KINASE ... |
| 204236_at   | 6.86E-04 | 2.6452 | FLI1    | FRIEND LEUKEMIA VIRUS INTEGRATION 1                                       |
| 202724_s_at | 1.06E-04 | 2.6418 | FOXO1A  | FORKHEAD BOX O1A (RHABDOMYOSARCOMA)                                       |
| 209684_at   | 8.22E-04 | 2.6371 | RIN2    | RAS AND RAB INTERACTOR 2                                                  |
| 212262_at   | 7.46E-05 | 2.6242 | QKI     | QUAKING HOMOLOG, KH DOMAIN RNA BINDING (MOUSE)                            |
| 208789_at   | 3.50E-05 | 2.6217 | PTRF    | POLYMERASE I AND TRANSCRIPT RELEASE FACTOR                                |
| 212522_at   | 6.71E-05 | 2.6190 | PDE8A   | PHOSPHODIESTERASE 8A                                                      |
| 204151_x_at | 8.99E-04 | 2.6172 | AKR1C1  | ALDO-KETO REDUCTASE FAMILY 1, MEMBER C1 (DIHYDRODIOL DEHYDROGENASE 1; ... |
| 211653_x_at | 2.72E-04 | 2.6168 | AKR1C2  | ALDO-KETO REDUCTASE FAMILY 1, MEMBER C2 (DIHYDRODIOL DEHYDROGENASE 2; ... |
| 202173_s_at | 1.44E-05 | 2.6139 | ZNF161  | ZINC FINGER PROTEIN 161                                                   |
| 211316_x_at | 2.60E-04 | 2.6102 | CFLAR   | CASP8 AND FADD-LIKE APOPTOSIS REGULATOR                                   |
| 201983_s_at | 1.48E-04 | 2.6030 | EGFR    | EPIDERMAL GROWTH FACTOR RECEPTOR (ERYTHROBLASTIC LEUKEMIA VIRAL (V-ERB... |

|             |          |        |          |                                                                           |
|-------------|----------|--------|----------|---------------------------------------------------------------------------|
| 204061_at   | 1.48E-04 | 2.5957 | PRKX     | PROTEIN KINASE, X-LINKED                                                  |
| 209285_s_at | 9.22E-04 | 2.5902 | C3ORF63  | CHROMOSOME 3 OPEN READING FRAME 63                                        |
| 201131_s_at | 6.64E-04 | 2.5894 | CDH1     | CADHERIN 1, TYPE 1, E-CADHERIN (EPITHELIAL)                               |
| 204201_s_at | 4.47E-04 | 2.5748 | PTPN13   | PROTEIN TYROSINE PHOSPHATASE, NON-RECEPTOR TYPE 13 (APO-1/CD95 (FAS)-A... |
| 218816_at   | 4.52E-04 | 2.5724 | LRRC1    | LEUCINE RICH REPEAT CONTAINING 1                                          |
| 212263_at   | 1.93E-04 | 2.5722 | QKI      | QUAKING HOMOLOG, KH DOMAIN RNA BINDING (MOUSE)                            |
| 221950_at   | 5.91E-04 | 2.5702 | EMX2     | EMPTY SPIRACLES HOMOLOG 2 (DROSOPHILA)                                    |
| 49306_at    | 8.35E-04 | 2.5531 | RASSF4   | RAS ASSOCIATION (RALGDS/AF-6) DOMAIN FAMILY 4                             |
| 201829_at   | 9.09E-05 | 2.5421 | NET1     | NEUROEPITHELIAL CELL TRANSFORMING GENE 1                                  |
| 204563_at   | 7.72E-04 | 2.5343 | SELL     | SELECTIN L (LYMPHOCYTE ADHESION MOLECULE 1)                               |
| 203705_s_at | 7.32E-04 | 2.5328 | FZD7     | FRIZZLED HOMOLOG 7 (DROSOPHILA)                                           |
| 210906_x_at | 2.40E-04 | 2.5316 | AQP4     | AQUAPORIN 4                                                               |
| 215073_s_at | 5.28E-04 | 2.5304 | NR2F2    | NUCLEAR RECEPTOR SUBFAMILY 2, GROUP F, MEMBER 2                           |
| 210276_s_at | 1.06E-05 | 2.5276 | TRIOBP   | TRIO AND F-ACTIN BINDING PROTEIN                                          |
| 218251_at   | 3.78E-04 | 2.5187 | MID1IP1  | MID1 INTERACTING PROTEIN 1 (GASTRULATION SPECIFIC G12-LIKE (ZEBRAFISH)... |
| 208712_at   | 5.62E-04 | 2.5168 | CCND1    | CYCLIN D1                                                                 |
| 202171_at   | 5.15E-05 | 2.5160 | ZNF161   | ZINC FINGER PROTEIN 161                                                   |
| 209343_at   | 7.03E-04 | 2.5026 | EFHD1    | EF-HAND DOMAIN FAMILY, MEMBER D1                                          |
| 218204_s_at | 5.93E-06 | 2.4950 | FYCO1    | FYVE AND COILED-COIL DOMAIN CONTAINING 1                                  |
| 214808_at   | 1.34E-04 | 2.4894 | NA       | ,CONSENSUS INCLUDES GB:AU147851 /FEA=EST /DB_XREF=GI:11009372 /DB_XREF    |
| 203238_s_at | 3.71E-05 | 2.4730 | NOTCH3   | NOTCH HOMOLOG 3 (DROSOPHILA)                                              |
| 205111_s_at | 1.30E-04 | 2.4627 | PLCE1    | PHOSPHOLIPASE C, EPSILON 1                                                |
| 203642_s_at | 4.92E-04 | 2.4568 | COBLL1   | COBL-LIKE 1                                                               |
| 210719_s_at | 4.61E-04 | 2.4556 | HMG20B   | HIGH-MOBILITY GROUP 20B                                                   |
| 204428_s_at | 7.34E-06 | 2.4480 | LCAT     | LECITHIN-CHOLESTEROL ACYLTRANSFERASE                                      |
| 201615_x_at | 9.97E-04 | 2.4385 | CALD1    | CALDESMON 1                                                               |
| 202011_at   | 2.60E-04 | 2.4374 | TJP1     | TIGHT JUNCTION PROTEIN 1 (ZONA OCCLUDENS 1)                               |
| 202172_at   | 1.43E-04 | 2.4352 | ZNF161   | ZINC FINGER PROTEIN 161                                                   |
| 205957_at   | 7.57E-05 | 2.4335 | PLXNB3   | PLEXIN B3                                                                 |
| 218248_at   | 2.56E-05 | 2.4272 | FAM111A  | FAMILY WITH SEQUENCE SIMILARITY 111, MEMBER A                             |
| 210983_s_at | 1.88E-04 | 2.4165 | MCM7     | MCM7 MINICHROMOSOME MAINTENANCE DEFICIENT 7 (S. CEREVISIAE)               |
| 218454_at   | 1.70E-04 | 2.4161 | FLJ22662 | HYPOTHETICAL PROTEIN FLJ22662                                             |
| 219371_s_at | 9.42E-04 | 2.4109 | KLF2     | KRUPPEL-LIKE FACTOR 2 (LUNG)                                              |
| 203295_s_at | 4.58E-04 | 2.4100 | ATP1A2   | ATPASE, NA+/K+ TRANSPORTING, ALPHA 2 (+) POLYPEPTIDE                      |
| 202350_s_at | 5.19E-04 | 2.3978 | MATN2    | MATRILIN 2                                                                |
| 208485_x_at | 2.47E-04 | 2.3977 | CFLAR    | CASP8 AND FADD-LIKE APOPTOSIS REGULATOR                                   |
| 202664_at   | 1.15E-04 | 2.3837 | WASPIP   | WISKOTT-ALDRICH SYNDROME PROTEIN INTERACTING PROTEIN                      |
| 210757_x_at | 9.98E-04 | 2.3782 | DAB2     | DISABLED HOMOLOG 2, MITOGEN-RESPONSIVE PHOSPHOPROTEIN (DROSOPHILA)        |
| 219779_at   | 1.94E-04 | 2.3705 | ZFHX4    | ZINC FINGER HOMEODOMAIN 4                                                 |
| 213236_at   | 6.35E-04 | 2.3688 | SASH1    | SAM AND SH3 DOMAIN CONTAINING 1                                           |
| 204112_s_at | 7.86E-04 | 2.3678 | HNMT     | HISTAMINE N-METHYLTRANSFERASE                                             |
| 218829_s_at | 9.35E-04 | 2.3543 | CHD7     | CHROMODOMAIN HELICASE DNA BINDING PROTEIN 7                               |
| 219255_x_at | 7.79E-04 | 2.3498 | IL17RB   | INTERLEUKIN 17 RECEPTOR B                                                 |

|                      |          |        |                       |                                                                                                |
|----------------------|----------|--------|-----------------------|------------------------------------------------------------------------------------------------|
| AFFX-r2-Ec-bioB-5_at | 2.22E-05 | 2.3488 | BIOB                  | BIOTIN SYNTHESIS, SULFUR INSERTION?                                                            |
| 203501_at            | 1.65E-04 | 2.3352 | PGCP                  | PLASMA GLUTAMATE CARBOXYPEPTIDASE                                                              |
| AFFX-BioB-5_at       | 9.66E-06 | 2.3318 | BIOB                  | BIOTIN SYNTHASE                                                                                |
| 211663_x_at          | 3.55E-05 | 2.3291 | PTGDS                 | PROSTAGLANDIN D2 SYNTHASE 21KDA (BRAIN)                                                        |
| 209656_s_at          | 7.32E-04 | 2.3270 | TMEM47                | TRANSMEMBRANE PROTEIN 47                                                                       |
| 201279_s_at          | 6.85E-04 | 2.3267 | DAB2                  | DISABLED HOMOLOG 2, MITOGEN-RESPONSIVE PHOSPHOPROTEIN (DROSOPHILA)                             |
| 220266_s_at          | 9.21E-04 | 2.3266 | KLF4                  | KRUPPEL-LIKE FACTOR 4 (GUT)                                                                    |
| 205801_s_at          | 8.35E-05 | 2.3236 | RASGRP3               | RAS GUANYL RELEASING PROTEIN 3 (CALCIUM AND DAG-REGULATED)                                     |
| 212494_at            | 1.78E-04 | 2.3202 | TENC1                 | TENSIN LIKE C1 DOMAIN CONTAINING PHOSPHATASE (TENSIN 2)                                        |
| 213069_at            | 3.24E-04 | 2.3196 | HEG1                  | HEG HOMOLOG 1 (ZEBRAFISH)                                                                      |
| 213005_s_at          | 6.87E-04 | 2.3190 | ANKRD15               | ANKYRIN REPEAT DOMAIN 15                                                                       |
| 221496_s_at          | 1.58E-04 | 2.3187 | TOB2                  | TRANSDUCER OF ERBB2, 2                                                                         |
| 202239_at            | 5.58E-04 | 2.3136 | PARP4                 | POLY (ADP-RIBOSE) POLYMERASE FAMILY, MEMBER 4                                                  |
| 221558_s_at          | 3.78E-04 | 2.3058 | LOC641518/LEF1        | LYMPHOID ENHANCER-BINDING FACTOR 1                                                             |
| 204964_s_at          | 7.45E-04 | 2.2968 | SSPN                  | SARCOSPAN (KRAS ONCOGENE-ASSOCIATED GENE)                                                      |
| 208986_at            | 7.08E-04 | 2.2909 | TCF12                 | TRANSCRIPTION FACTOR 12 (HTF4, HELIX-LOOP-HELIX TRANSCRIPTION FACTORS ...)                     |
| 212345_s_at          | 5.86E-04 | 2.2861 | CREB3L2               | CAMP RESPONSIVE ELEMENT BINDING PROTEIN 3-LIKE 2                                               |
| 206363_at            | 1.06E-04 | 2.2843 | MAF                   | V-MAF MUSCULOAPONEUROTIC FIBROSARCOMA ONCOGENE HOMOLOG (AVIAN)                                 |
| 204187_at            | 6.00E-04 | 2.2817 | GMPR                  | GUANOSINE MONOPHOSPHATE REDUCTASE                                                              |
| 219719_at            | 3.68E-05 | 2.2813 | HIGD1B                | HIG1 DOMAIN FAMILY, MEMBER 1B                                                                  |
| 203304_at            | 1.58E-04 | 2.2746 | BAMBI                 | BMP AND ACTIVIN MEMBRANE-BOUND INHIBITOR HOMOLOG (XENOPUS LAEVIS)                              |
| 210564_x_at          | 2.24E-04 | 2.2743 | CFLAR                 | CASP8 AND FADD-LIKE APOPTOSIS REGULATOR                                                        |
| 218424_s_at          | 2.30E-05 | 2.2729 | STEAP3                | STEAP FAMILY MEMBER 3                                                                          |
| 209496_at            | 1.02E-04 | 2.2688 | RARRES2               | RETINOIC ACID RECEPTOR RESPONDER (TAZAROTENE INDUCED) 2                                        |
| 209906_at            | 7.76E-04 | 2.2670 | C3AR1                 | COMPLEMENT COMPONENT 3A RECEPTOR 1                                                             |
| 208937_s_at          | 7.04E-04 | 2.2662 | ID1                   | INHIBITOR OF DNA BINDING 1, DOMINANT NEGATIVE HELIX-LOOP-HELIX PROTEIN                         |
| 221527_s_at          | 3.06E-04 | 2.2631 | PARD3                 | PAR-3 PARTITIONING DEFECTIVE 3 HOMOLOG (C. ELEGANS)                                            |
| 205609_at            | 7.16E-04 | 2.2627 | ANGPT1                | ANGIOPOIETIN 1                                                                                 |
| 208438_s_at          | 5.86E-04 | 2.2596 | FGR                   | GARDNER-RASHEED FELINE SARCOMA VIRAL (V-FGR) ONCOGENE HOMOLOG                                  |
| 209121_x_at          | 3.87E-04 | 2.2589 | NR2F2                 | NUCLEAR RECEPTOR SUBFAMILY 2, GROUP F, MEMBER 2                                                |
| 208033_s_at          | 2.25E-04 | 2.2559 | ATBF1                 | AT-BINDING TRANSCRIPTION FACTOR 1                                                              |
| 41644_at             | 3.54E-04 | 2.2526 | SASH1                 | SAM AND SH3 DOMAIN CONTAINING 1                                                                |
| 214833_at            | 7.71E-04 | 2.2503 | TMEM63A               | TRANSMEMBRANE PROTEIN 63A                                                                      |
| 213348_at            | 3.13E-04 | 2.2444 | CDKN1C                | CYCLIN-DEPENDENT KINASE INHIBITOR 1C (P57, KIP2)                                               |
| 212122_at            | 7.49E-04 | 2.2362 | RHOQ                  | RAS HOMOLOG GENE FAMILY, MEMBER Q                                                              |
| 201209_at            | 6.30E-05 | 2.2358 | HDAC1                 | HISTONE DEACETYLASE 1                                                                          |
| 210166_at            | 2.65E-04 | 2.2338 | TLR5                  | TOLL-LIKE RECEPTOR 5                                                                           |
| 214709_s_at          | 2.22E-04 | 2.2311 | KTN1/PDIA6            | KINECTIN 1 (KINESIN RECEPTOR), PROTEIN DISULFIDE ISOMERASE FAMILY A, MEMBER 6                  |
| 214693_x_at          | 3.64E-04 | 2.2279 | NBPF12/KIAA1245/NBPF1 | KIAA1245, NEUROBLASTOMA BREAKPOINT FAMILY MEMBER 14, NEUROBLASTOMA BREAKPOINT FAMILY, MEMBER 9 |

|                          |          |        | 5/NBPF14/NB<br>PF11/FBPF1/F<br>BPF10/NBPF9 |                                                                                   |
|--------------------------|----------|--------|--------------------------------------------|-----------------------------------------------------------------------------------|
| 205859_at                | 5.51E-04 | 2.2213 | LY86                                       | LYMPHOCYTE ANTIGEN 86                                                             |
| 221928_at                | 1.35E-04 | 2.2135 | ACACB                                      | ACETYL-COENZYME A CARBOXYLASE BETA                                                |
| 209102_s_at              | 2.79E-04 | 2.2120 | HBP1                                       | HMG-BOX TRANSCRIPTION FACTOR 1                                                    |
| 200915_x_at              | 1.82E-04 | 2.2110 | KTN1/PDIA6                                 | KINECTIN 1 (KINESIN RECEPTOR), PROTEIN<br>DISULFIDE ISOMERASE FAMILY A, MEMBER 6  |
| 201785_at                | 5.71E-04 | 2.1954 | RNASE1                                     | RIBONUCLEASE, RNASE A FAMILY, 1<br>(PANCREATIC)                                   |
| 217892_s_at              | 2.74E-04 | 2.1949 | LIMA1                                      | LIM DOMAIN AND ACTIN BINDING 1                                                    |
| 203964_at                | 5.49E-04 | 2.1920 | NMI                                        | N-MYC (AND STAT) INTERACTOR                                                       |
| 207169_x_at              | 1.96E-04 | 2.1918 | DDR1                                       | DISCOIDIN DOMAIN RECEPTOR FAMILY,<br>MEMBER 1                                     |
| 215807_s_at              | 1.13E-04 | 2.1888 | PLXNB1                                     | PLEXIN B1                                                                         |
| 218844_at                | 3.14E-04 | 2.1874 | FLJ20920                                   | HYPOTHETICAL PROTEIN FLJ20920                                                     |
| AFFX-<br>BioDn-5_at      | 6.20E-05 | 2.1834 | BIOD                                       | BIOTIN SYNTHESIS PROTEIN BIOC                                                     |
| AFFX-r2-Ec-<br>bioB-M_at | 3.66E-05 | 2.1798 | BIOB                                       | BIOTIN SYNTHETASE                                                                 |
| 201150_s_at              | 3.96E-05 | 2.1782 | TIMP3                                      | TIMP METALLOPEPTIDASE INHIBITOR 3 (SORSBY<br>FUNDUS DYSTROPHY, PSEUDOINFL...      |
| 214720_x_at              | 1.68E-05 | 2.1744 | SEPT10                                     | SEPTIN 10                                                                         |
| 209119_x_at              | 2.84E-04 | 2.1667 | NR2F2                                      | NUCLEAR RECEPTOR SUBFAMILY 2, GROUP F,<br>MEMBER 2                                |
| 210524_x_at              | 2.61E-04 | 2.1579 | MT1F                                       | METALLOTHIONEIN 1F (FUNCTIONAL)                                                   |
| 58780_s_at               | 1.99E-04 | 2.1547 | FLJ10357                                   | HYPOTHETICAL PROTEIN FLJ10357                                                     |
| 203593_at                | 7.15E-04 | 2.1533 | CD2AP                                      | CD2-ASSOCIATED PROTEIN                                                            |
| 219956_at                | 9.58E-04 | 2.1463 | GALNT6                                     | UDP-N-ACETYL-ALPHA-D-<br>GALACTOSAMINE:POLYPEPTIDE N-<br>ACETYLGALACTOSAMINYLT... |
| 221526_x_at              | 3.69E-04 | 2.1463 | PARD3                                      | PAR-3 PARTITIONING DEFECTIVE 3 HOMOLOG (C.<br>ELEGANS)                            |
| 219243_at                | 4.94E-04 | 2.1458 | GIMAP4                                     | GTPASE, IMAP FAMILY MEMBER 4                                                      |
| 210220_at                | 5.05E-04 | 2.1426 | FZD2                                       | FRIZZLED HOMOLOG 2 (DROSOPHILA)                                                   |
| 212398_at                | 5.26E-05 | 2.1423 | RDX                                        | RADIXIN                                                                           |
| 203961_at                | 4.02E-04 | 2.1404 | NEBL                                       | NEBULETTE                                                                         |
| 200696_s_at              | 4.18E-04 | 2.1401 | GSN                                        | GELSOLIN (AMYLOIDOSIS, FINNISH TYPE)                                              |
| 209267_s_at              | 1.22E-04 | 2.1381 | SLC39A8                                    | SOLUTE CARRIER FAMILY 39 (ZINC<br>TRANSPORTER), MEMBER 8                          |
| 216942_s_at              | 2.42E-05 | 2.1361 | CD58                                       | CD58 ANTIGEN, (LYMPHOCYTE FUNCTION-<br>ASSOCIATED ANTIGEN 3)                      |
| 209298_s_at              | 8.51E-04 | 2.1320 | ITSN1                                      | INTERSECTIN 1 (SH3 DOMAIN PROTEIN)                                                |
| 208683_at                | 3.93E-04 | 2.1318 | CAPN2                                      | CALPAIN 2, (M/II) LARGE SUBUNIT                                                   |
| 209071_s_at              | 6.13E-04 | 2.1310 | RGS5                                       | REGULATOR OF G-PROTEIN SIGNALLING 5                                               |
| 208430_s_at              | 6.53E-05 | 2.1304 | DTNA                                       | DYSTROBREVIN, ALPHA                                                               |
| 212377_s_at              | 2.02E-04 | 2.1271 | NOTCH2                                     | NOTCH HOMOLOG 2 (DROSOPHILA)                                                      |
| AFFX-BioB-<br>3_at       | 9.03E-05 | 2.1211 | BIOB                                       | BIOTIN SYNTHESIS, SULFUR INSERTION?                                               |
| 203620_s_at              | 4.49E-04 | 2.1179 | FCHSD2                                     | FCH AND DOUBLE SH3 DOMAINS 2                                                      |
| 213160_at                | 1.94E-04 | 2.1166 | DOCK2                                      | DEDICATOR OF CYTOKINESIS 2                                                        |
| 203178_at                | 1.38E-05 | 2.1141 | GATM                                       | GLYCINE AMIDINOTRANSFERASE (L-<br>ARGININE:GLYCINE AMIDINOTRANSFERASE)            |
| 208779_x_at              | 5.79E-04 | 2.1134 | DDR1                                       | DISCOIDIN DOMAIN RECEPTOR FAMILY,<br>MEMBER 1                                     |
| 214265_at                | 1.42E-04 | 2.1106 | ITGA8                                      | INTEGRIN, ALPHA 8                                                                 |
| 218831_s_at              | 1.07E-04 | 2.1098 | FCGRT                                      | FC FRAGMENT OF IGG, RECEPTOR,                                                     |

|                      |          |        |          |                                                                           |
|----------------------|----------|--------|----------|---------------------------------------------------------------------------|
|                      |          |        |          | TRANSPORTER, ALPHA                                                        |
| 203083_at            | 2.33E-04 | 2.1081 | THBS2    | THROMBOSPONDIN 2                                                          |
| 209558_s_at          | 7.63E-04 | 2.1055 | HIP1R    | HUNTINGTIN INTERACTING PROTEIN 1 RELATED                                  |
| 221900_at            | 1.85E-05 | 2.1008 | COL8A2   | COLLAGEN, TYPE VIII, ALPHA 2                                              |
| 204959_at            | 2.41E-04 | 2.0992 | MNDA     | MYELOID CELL NUCLEAR DIFFERENTIATION ANTIGEN                              |
| 210051_at            | 2.58E-04 | 2.0971 | RAPGEF3  | RAP GUANINE NUCLEOTIDE EXCHANGE FACTOR (GEF) 3                            |
| 212658_at            | 4.41E-04 | 2.0970 | LHFPL2   | LIPOMA HMGIC FUSION PARTNER-LIKE 2                                        |
| AFFX-r2-Ec-bioC-5_at | 1.20E-04 | 2.0914 | BIOC     | BIOTIN SYNTHESIS PROTEIN BIOC                                             |
| AFFX-BioB-M_at       | 1.98E-05 | 2.0900 | BIOB     | BIOTIN SYNTHASE                                                           |
| 202443_x_at          | 2.09E-04 | 2.0892 | NOTCH2   | NOTCH HOMOLOG 2 (DROSOPHILA)                                              |
| 216264_s_at          | 1.68E-04 | 2.0826 | LAMB2    | LAMININ, BETA 2 (LAMININ S)                                               |
| 208790_s_at          | 4.09E-05 | 2.0820 | PTRF     | POLYMERASE I AND TRANSCRIPT RELEASE FACTOR                                |
| 215526_at            | 1.94E-04 | 2.0820 | WWOX     | PUTATIVE OXIDOREDUCTASE                                                   |
| 221276_s_at          | 9.78E-05 | 2.0816 | SYNC1    | SYNCOILIN, INTERMEDIATE FILAMENT 1                                        |
| 210749_x_at          | 7.73E-04 | 2.0809 | DDR1     | DISCOIDIN DOMAIN RECEPTOR FAMILY, MEMBER 1                                |
| 205137_x_at          | 7.08E-04 | 2.0780 | USH1C    | USHER SYNDROME 1C (AUTOSOMAL RECESSIVE, SEVERE)                           |
| 218414_s_at          | 3.80E-05 | 2.0779 | NDE1     | NUDE NUCLEAR DISTRIBUTION GENE E HOMOLOG 1 (A. NIDULANS)                  |
| 211748_x_at          | 4.84E-05 | 2.0768 | PTGDS    | PROSTAGLANDIN D2 SYNTHASE 21KDA (BRAIN)                                   |
| 213578_at            | 3.36E-04 | 2.0754 | BMPR1A   | BONE MORPHOGENETIC PROTEIN RECEPTOR, TYPE IA                              |
| 202723_s_at          | 1.86E-04 | 2.0749 | FOXO1A   | FORKHEAD BOX O1A (RHABDOMYOSARCOMA)                                       |
| 212187_x_at          | 5.13E-05 | 2.0748 | PTGDS    | PROSTAGLANDIN D2 SYNTHASE 21KDA (BRAIN)                                   |
| 202484_s_at          | 6.78E-04 | 2.0747 | MBD2     | METHYL-CPG BINDING DOMAIN PROTEIN 2                                       |
| AFFX-r2-Ec-bioB-3_at | 3.70E-04 | 2.0741 | BIOB     | PUTATIVE ENZYME BIOC                                                      |
| 205988_at            | 1.68E-04 | 2.0736 | CD84     | CD84 ANTIGEN (LEUKOCYTE ANTIGEN)                                          |
| 212785_s_at          | 4.44E-04 | 2.0707 | HDCMA18P | DKFZP564K112 PROTEIN                                                      |
| 213437_at            | 3.53E-04 | 2.0646 | NA       | SIMILAR TO RUN AND FYVE DOMAIN-CONTAINING 2; RUN- AND FYVE-DOMAIN CONT    |
| 206171_at            | 3.10E-04 | 2.0630 | ADORA3   | ADENOSINE A3 RECEPTOR                                                     |
| 205112_at            | 7.30E-04 | 2.0602 | PLCE1    | PHOSPHOLIPASE C, EPSILON 1                                                |
| AFFX-r2-Ec-bioD-5_at | 2.17E-04 | 2.0556 | BIOD     | DETHIOBIOTIN SYNTHETASE                                                   |
| 218700_s_at          | 2.83E-04 | 2.0537 | RAB7L1   | RAB7, MEMBER RAS ONCOGENE FAMILY-LIKE 1                                   |
| 209508_x_at          | 6.32E-05 | 2.0522 | CFLAR    | CASP8 AND FADD-LIKE APOPTOSIS REGULATOR                                   |
| 221747_at            | 7.17E-04 | 2.0442 | TNS1     | TENSIN 1                                                                  |
| 205846_at            | 2.79E-04 | 2.0403 | PTPRB    | PROTEIN TYROSINE PHOSPHATASE, RECEPTOR TYPE, B                            |
| 209070_s_at          | 3.55E-04 | 2.0331 | RGS5     | REGULATOR OF G-PROTEIN SIGNALLING 5                                       |
| 214181_x_at          | 3.57E-05 | 2.0328 | LST1     | LEUKOCYTE-SPECIFIC TRANSCRIPT 1                                           |
| 201346_at            | 2.38E-04 | 2.0281 | ADIPOR2  | ADIPONECTIN RECEPTOR 2                                                    |
| 202994_s_at          | 6.35E-04 | 2.0242 | FBLN1    | FIBULIN 1                                                                 |
| 213656_s_at          | 2.70E-04 | 2.0226 | KNS2     | KINESIN 2                                                                 |
| 214829_at            | 6.12E-04 | 2.0223 | AASS     | AMINOADIPATE-SEMIALDEHYDE SYNTHASE                                        |
| AFFX-BioC-3_at       | 1.99E-04 | 2.0216 | BIOC     | BIOTIN SYNTHESIS, SULFUR INSERTION?                                       |
| 204342_at            | 4.01E-04 | 2.0179 | SLC25A24 | SOLUTE CARRIER FAMILY 25 (MITOCHONDRIAL CARRIER; PHOSPHATE CARRIER), M... |

|             |          |        |            |                                                                           |
|-------------|----------|--------|------------|---------------------------------------------------------------------------|
| 209655_s_at | 2.73E-04 | 2.0126 | TMEM47     | TRANSMEMBRANE PROTEIN 47                                                  |
| 212420_at   | 1.37E-04 | 2.0125 | ELF1       | E74-LIKE FACTOR 1 (ETS DOMAIN TRANSCRIPTION FACTOR)                       |
| 204983_s_at | 9.53E-04 | 2.0103 | GPC4       | GLYPICAN 4                                                                |
| 209826_at   | 1.90E-05 | 2.0079 | PPT2/EGFL8 | PALMITOYL-PROTEIN THIOESTERASE 2                                          |
| 202687_s_at | 5.88E-04 | 2.0029 | TNFSF10    | TUMOR NECROSIS FACTOR (LIGAND) SUPERFAMILY, MEMBER 10                     |
|             |          |        |            |                                                                           |
| 221805_at   | 3.57E-04 | 0.0837 | NEFL       | NEUROFILAMENT, LIGHT POLYPEPTIDE 68KDA                                    |
| 205825_at   | 3.40E-04 | 0.0838 | PCSK1      | PROPROTEIN CONVERTASE SUBTILISIN/KEXIN TYPE 1                             |
| 206935_at   | 2.05E-05 | 0.0860 | PCDH8      | PROTODADHERIN 8                                                           |
| 214432_at   | 2.21E-04 | 0.1106 | ATP1A3     | ATPASE, NA+/K+ TRANSPORTING, ALPHA 3 POLYPEPTIDE                          |
| 204337_at   | 4.79E-05 | 0.1146 | RGS4       | REGULATOR OF G-PROTEIN SIGNALLING 4                                       |
| 203998_s_at | 8.59E-04 | 0.1191 | SYT1       | SYNAPTOTAGMIN I                                                           |
| 203000_at   | 1.18E-04 | 0.1280 | STMN2      | STATHMIN-LIKE 2                                                           |
| 201939_at   | 2.83E-05 | 0.1330 | PLK2       | POLO-LIKE KINASE 2 (DROSOPHILA)                                           |
| 206115_at   | 2.22E-06 | 0.1342 | EGR3       | EARLY GROWTH RESPONSE 3                                                   |
| 204339_s_at | 1.24E-04 | 0.1399 | RGS4       | REGULATOR OF G-PROTEIN SIGNALLING 4                                       |
| 206552_s_at | 4.88E-04 | 0.1414 | TAC1       | TACHYKININ, PRECURSOR 1 (SUBSTANCE K, SUBSTANCE P, NEUROKININ 1, NEURO... |
| 203999_at   | 4.34E-05 | 0.1420 | SYT1       | SYNAPTOTAGMIN I                                                           |
| 220359_s_at | 6.21E-05 | 0.1433 | ARPP-21    | CYCLIC AMP-REGULATED PHOSPHOPROTEIN, 21 KD                                |
| 206678_at   | 1.63E-04 | 0.1443 | GABRA1     | GAMMA-AMINOBUTYRIC ACID (GABA) A RECEPTOR, ALPHA 1                        |
| 214230_at   | 4.53E-05 | 0.1454 | CDC42      | CELL DIVISION CYCLE 42 (GTP BINDING PROTEIN, 25KDA)                       |
| 203001_s_at | 3.02E-04 | 0.1476 | STMN2      | STATHMIN-LIKE 2                                                           |
| 201340_s_at | 3.92E-04 | 0.1477 | ENC1       | ECTODERMAL-NEURAL CORTEX (WITH BTB-LIKE DOMAIN)                           |
| 204035_at   | 1.68E-04 | 0.1490 | SCG2       | SECRETOTRANIN II (CHROMOGRANIN C)                                         |
| 221916_at   | 1.94E-04 | 0.1507 | NEFL       | NEUROFILAMENT, LIGHT POLYPEPTIDE 68KDA                                    |
| 204722_at   | 7.20E-05 | 0.1540 | SCN3B      | SODIUM CHANNEL, VOLTAGE-GATED, TYPE III, BETA                             |
| 220979_s_at | 4.01E-05 | 0.1559 | ST6GALNAC5 | ST6 (ALPHA-N-ACETYL-NEURAMINYL-2,3-BETA-GALACTOSYL-1,3)-N-ACETYLGALACT... |
| 201341_at   | 7.04E-05 | 0.1583 | ENC1       | ECTODERMAL-NEURAL CORTEX (WITH BTB-LIKE DOMAIN)                           |
| 215303_at   | 1.70E-04 | 0.1663 | DCAMKL1    | DOUBLECORTIN AND CAM KINASE-LIKE 1                                        |
| 206290_s_at | 4.13E-05 | 0.1677 | RGS7       | REGULATOR OF G-PROTEIN SIGNALLING 7                                       |
| 213436_at   | 7.96E-05 | 0.1686 | CNR1       | CANNABINOID RECEPTOR 1 (BRAIN)                                            |
| 206384_at   | 6.45E-05 | 0.1727 | CACNG3     | CALCIUM CHANNEL, VOLTAGE-DEPENDENT, GAMMA SUBUNIT 3                       |
| 205110_s_at | 6.30E-05 | 0.1738 | FGF13      | FIBROBLAST GROWTH FACTOR 13                                               |
| 214811_at   | 1.37E-04 | 0.1740 | RIMBP2     | RIMS BINDING PROTEIN 2                                                    |
| 204260_at   | 4.14E-04 | 0.1750 | CHGB       | CHROMOGRANIN B (SECRETOTRANIN 1)                                          |
| 210016_at   | 7.02E-05 | 0.1754 | MYT1L      | MYELIN TRANSCRIPTION FACTOR 1-LIKE                                        |
| 221801_x_at | 2.40E-04 | 0.1760 | NEFL       | NEUROFILAMENT, LIGHT POLYPEPTIDE 68KDA                                    |
| 215241_at   | 6.52E-05 | 0.1780 | TMEM16C    | TRANSMEMBRANE PROTEIN 16C                                                 |
| 203797_at   | 2.43E-04 | 0.1794 | VSNL1      | VISININ-LIKE 1                                                            |
| 219896_at   | 3.46E-04 | 0.1825 | DRD1IP     | DOPAMINE RECEPTOR D1 INTERACTING PROTEIN                                  |
| 205278_at   | 4.44E-04 | 0.1827 | GAD1       | GLUTAMATE DECARBOXYLASE 1 (BRAIN, 67KDA)                                  |
| 213808_at   | 2.80E-04 | 0.1845 | ADAM23     | ADAM METALLOPEPTIDASE DOMAIN 23                                           |

|             |          |        |                |                                                                            |
|-------------|----------|--------|----------------|----------------------------------------------------------------------------|
| 204230_s_at | 7.64E-04 | 0.1847 | SLC17A7        | SOLUTE CARRIER FAMILY 17 (SODIUM-DEPENDENT INORGANIC PHOSPHATE COTRANS...  |
| 209755_at   | 6.98E-04 | 0.1856 | NMNAT2         | NICOTINAMIDE NUCLEOTIDE ADENYLYLTRANSFERASE 2                              |
| 204465_s_at | 2.65E-04 | 0.1882 | INA            | INTERNEXIN NEURONAL INTERMEDIATE FILAMENT PROTEIN, ALPHA                   |
| 204471_at   | 4.59E-05 | 0.1893 | GAP43          | GROWTH ASSOCIATED PROTEIN 43                                               |
| 210181_s_at | 3.00E-04 | 0.1928 | CABP1          | CALCIUM BINDING PROTEIN 1 (CALBRAIN)                                       |
| 211685_s_at | 1.64E-04 | 0.1958 | NCALD          | NEUROCALCIN DELTA                                                          |
| 206275_s_at | 2.87E-04 | 0.1969 | MICAL2         | MICROTUBULE ASSOCIATED MONOOXYGENASE, CALPONIN AND LIM DOMAIN CONTAININ... |
| 211616_s_at | 1.39E-04 | 0.1972 | HTR2A          | 5-HYDROXYTRYPTAMINE (SEROTONIN) RECEPTOR 2A                                |
| 204953_at   | 1.14E-04 | 0.1989 | SNAP91         | SYNAPTOSOMAL-ASSOCIATED PROTEIN, 91KDA HOMOLOG (MOUSE)                     |
| 206698_at   | 2.81E-05 | 0.2016 | XK             | X-LINKED KX BLOOD GROUP (MCLEOD SYNDROME)                                  |
| 203413_at   | 1.27E-04 | 0.2017 | NELL2          | NEL-LIKE 2 (CHICKEN)                                                       |
| 219855_at   | 4.10E-06 | 0.2029 | NUDT11         | NUDIX (NUCLEOSIDE DIPHOSPHATE LINKED MOIETY X)-TYPE MOTIF 11               |
| 207853_s_at | 1.34E-04 | 0.2029 | SNCB           | SYNUCLEIN, BETA                                                            |
| 204723_at   | 4.09E-05 | 0.2035 | SCN3B          | SODIUM CHANNEL, VOLTAGE-GATED, TYPE III, BETA                              |
| 210232_at   | 8.59E-04 | 0.2041 | CDC42          | CELL DIVISION CYCLE 42 (GTP BINDING PROTEIN, 25KDA)                        |
| 218625_at   | 2.43E-05 | 0.2055 | NRN1           | NEURITIN 1                                                                 |
| 207957_s_at | 1.64E-04 | 0.2071 | PRKCB1         | PROTEIN KINASE C, BETA 1                                                   |
| 212554_at   | 9.39E-05 | 0.2105 | CAP2           | CAP, ADENYLATE CYCLASE-ASSOCIATED PROTEIN, 2 (YEAST)                       |
| 204869_at   | 1.91E-05 | 0.2137 | PCSK2          | PROPROTEIN CONVERTASE SUBTILISIN/KEXIN TYPE 2                              |
| 209990_s_at | 2.10E-05 | 0.2159 | GABBR2         | GAMMA-AMINOBUTYRIC ACID (GABA) B RECEPTOR, 2                               |
| 214998_at   | 3.48E-05 | 0.2165 | DKFZP686K16132 | SIMILAR TO BMP2 INDUCIBLE KINASE                                           |
| 214945_at   | 3.94E-04 | 0.2166 | NY-REN-7/NA    | KIAA0752 PROTEIN                                                           |
| 219368_at   | 1.18E-04 | 0.2170 | NAP1L2         | NUCLEOSOME ASSEMBLY PROTEIN 1-LIKE 2                                       |
| 214956_at   | 5.79E-04 | 0.2171 | DKFZP686K16132 | SIMILAR TO BMP2 INDUCIBLE KINASE                                           |
| 210247_at   | 2.98E-05 | 0.2172 | SYN2           | SYNAPSIN II                                                                |
| 214098_at   | 1.40E-04 | 0.2175 | KIAA1107       | KIAA1107                                                                   |
| 210222_s_at | 3.26E-04 | 0.2178 | RTN1           | RETICULON 1                                                                |
| 219308_s_at | 1.18E-04 | 0.2182 | AK5            | ADENYLATE KINASE 5                                                         |
| 205230_at   | 3.56E-04 | 0.2196 | RPH3A          | RABPHILIN 3A HOMOLOG (MOUSE)                                               |
| 221914_at   | 1.50E-05 | 0.2201 | SYN1           | SYNAPSIN I                                                                 |
| 202854_at   | 4.18E-04 | 0.2226 | HPRT1          | HYPOXANTHINE PHOSPHORIBOSYLTRANSFERASE 1 (LESCH-NYHAN SYNDROME)            |
| 206051_at   | 5.51E-05 | 0.2239 | ELAVL4         | ELAV (EMBRYONIC LETHAL, ABNORMAL VISION, DROSOPHILA)-LIKE 4 (HU ANTIGE...  |
| 206731_at   | 2.03E-04 | 0.2253 | CNKS2          | CONNECTOR ENHANCER OF KINASE SUPPRESSOR OF RAS 2                           |
| 217077_s_at | 6.71E-05 | 0.2254 | GABBR2         | GAMMA-AMINOBUTYRIC ACID (GABA) B RECEPTOR, 2                               |
| 219736_at   | 1.64E-05 | 0.2267 | TRIM36         | TRIPARTITE MOTIF-CONTAINING 36                                             |
| 203159_at   | 3.55E-04 | 0.2278 | GLS            | GLUTAMINASE                                                                |
| 205551_at   | 1.88E-05 | 0.2295 | SV2B           | SYNAPTIC VESICLE GLYCOPROTEIN 2B                                           |
| 219463_at   | 4.59E-04 | 0.2297 | C20ORF103      | CHROMOSOME 20 OPEN READING FRAME 103                                       |



|             |          |        |                      |                                                                           |
|-------------|----------|--------|----------------------|---------------------------------------------------------------------------|
| 213486_at   | 5.04E-05 | 0.2332 | DKFZP761N09121/COPG2 | COATOMER PROTEIN COMPLEX, SUBUNIT GAMMA 2                                 |
| 205489_at   | 6.27E-04 | 0.2332 | CRYM                 | CRYSTALLIN, MU                                                            |
| 213920_at   | 2.47E-04 | 0.2344 | CUTL2                | CUT-LIKE 2 (DROSOPHILA)                                                   |
| 218404_at   | 1.13E-04 | 0.2348 | SNX10                | SORTING NEXIN 10                                                          |
| 206481_s_at | 6.48E-05 | 0.2349 | LDB2                 | LIM DOMAIN BINDING 2                                                      |
| 215161_at   | 7.89E-05 | 0.2355 | CAMK1G               | CALCIUM/CALMODULIN-DEPENDENT PROTEIN KINASE IG                            |
| 210040_at   | 2.93E-04 | 0.2373 | SLC12A5              | SOLUTE CARRIER FAMILY 12, (POTASSIUM-CHLORIDE TRANSPORTER) MEMBER 5       |
| 211451_s_at | 1.48E-04 | 0.2383 | KCNJ4                | POTASSIUM INWARDLY-RECTIFYING CHANNEL, SUBFAMILY J, MEMBER 4              |
| 206013_s_at | 4.77E-04 | 0.2407 | ACTL6B               | ACTIN-LIKE 6B                                                             |
| 213938_at   | 2.88E-04 | 0.2409 | CAST1                | CAZ-ASSOCIATED STRUCTURAL PROTEIN                                         |
| 209372_x_at | 2.48E-05 | 0.2416 | TUBB2ATUBB2B         | TUBULIN, BETA 2A AND BETA 2B                                              |
| 209991_x_at | 2.22E-04 | 0.2424 | GABBR2               | GAMMA-AMINOBUTYRIC ACID (GABA) B RECEPTOR, 2                              |
| 204675_at   | 3.76E-04 | 0.2445 | SRD5A1               | STEROID-5-ALPHA-REDUCTASE, ALPHA POLYPEPTIDE 1 (3-OXO-5 ALPHA-STEROID ... |
| 213200_at   | 4.92E-05 | 0.2448 | SYP                  | SYNAPTOPHYSIN                                                             |
| 219619_at   | 1.15E-04 | 0.2468 | DIRAS2               | DIRAS FAMILY, GTP-BINDING RAS-LIKE 2                                      |
| 205751_at   | 6.85E-04 | 0.2481 | SH3GL2               | SH3-DOMAIN GRB2-LIKE 2                                                    |
| 203889_at   | 6.26E-04 | 0.2481 | SGNE1                | SECRETORY GRANULE, NEUROENDOCRINE PROTEIN 1 (7B2 PROTEIN)                 |
| 205635_at   | 2.36E-04 | 0.2483 | KALRN                | KALIRIN, RHOGEF KINASE                                                    |
| 204364_s_at | 2.55E-04 | 0.2487 | REEP1                | RECEPTOR ACCESSORY PROTEIN 1                                              |
| 204995_at   | 1.73E-04 | 0.2491 | CDK5R1               | CYCLIN-DEPENDENT KINASE 5, REGULATORY SUBUNIT 1 (P35)                     |
| 204697_s_at | 3.11E-05 | 0.2510 | CHGA                 | CHROMOGRANIN A (PARATHYROID SECRETORY PROTEIN 1)                          |
| 204540_at   | 1.03E-04 | 0.2518 | EEF1A2               | EUKARYOTIC TRANSLATION ELONGATION FACTOR 1 ALPHA 2                        |
| 215972_at   | 4.04E-05 | 0.2518 | NA                   | ,CONSENSUS INCLUDES GB:AF070547.1 /DEF=HOMO SAPIENS CLONE 24820 MRNA S    |
| 218868_at   | 4.01E-05 | 0.2526 | ACTR3B               | ARP3 ACTIN-RELATED PROTEIN 3 HOMOLOG B (YEAST)                            |
| 212551_at   | 1.61E-04 | 0.2528 | CAP2                 | CAP, ADENYLATE CYCLASE-ASSOCIATED PROTEIN, 2 (YEAST)                      |
| 202395_at   | 9.68E-04 | 0.2555 | NSF                  | N-ETHYLMALEIMIDE-SENSITIVE FACTOR                                         |
| 205257_s_at | 6.61E-04 | 0.2556 | AMPH                 | AMPHIPHYSIN (STIFF-MAN SYNDROME WITH BREAST CANCER 128KDA AUTOANTIGEN)    |
| 213040_s_at | 2.70E-05 | 0.2557 | NPTXR                | NEURONAL PENTRAXIN RECEPTOR                                               |
| 205737_at   | 2.18E-05 | 0.2563 | KCNQ2                | POTASSIUM VOLTAGE-GATED CHANNEL, KQT-LIKE SUBFAMILY, MEMBER 2             |
| 201387_s_at | 2.40E-04 | 0.2580 | UCHL1                | UBIQUITIN CARBOXYL-TERMINAL ESTERASE L1 (UBIQUITIN THIOLESTERASE)         |
| 207135_at   | 1.67E-05 | 0.2589 | HTR2A                | 5-HYDROXYTRYPTAMINE (SEROTONIN) RECEPTOR 2A                               |
| 213435_at   | 3.37E-04 | 0.2593 | SATB2                | SATB FAMILY MEMBER 2                                                      |
| 221288_at   | 2.81E-05 | 0.2606 | GPR22                | G PROTEIN-COUPLED RECEPTOR 22                                             |
| 204870_s_at | 9.38E-05 | 0.2608 | PCSK2                | PROPROTEIN CONVERTASE SUBTILISIN/KEXIN TYPE 2                             |
| 209583_s_at | 2.15E-04 | 0.2608 | CD200                | CD200 ANTIGEN                                                             |
| 214874_at   | 1.33E-04 | 0.2611 | PKP4                 | PLAKOPHILIN 4                                                             |
| 205678_at   | 7.98E-05 | 0.2612 | AP3B2                | ADAPTOR-RELATED PROTEIN COMPLEX 3, BETA 2 SUBUNIT                         |
| 206089_at   | 1.12E-04 | 0.2621 | NELL1                | NEL-LIKE 1 (CHICKEN)                                                      |
| 209582_s_at | 3.15E-04 | 0.2633 | CD200                | CD200 ANTIGEN                                                             |
| 202508_s_at | 5.46E-04 | 0.2642 | SNAP25               | SYNAPTOSOMAL-ASSOCIATED PROTEIN, 25KDA                                    |

|             |          |        |          |                                                                           |
|-------------|----------|--------|----------|---------------------------------------------------------------------------|
| 210454_s_at | 6.62E-05 | 0.2667 | KCNJ6    | POTASSIUM INWARDLY-RECTIFYING CHANNEL, SUBFAMILY J, MEMBER 6              |
| 221217_s_at | 8.51E-05 | 0.2670 | A2BP1    | ATAXIN 2-BINDING PROTEIN 1                                                |
| 219140_s_at | 1.47E-04 | 0.2672 | RBP4     | RETINOL BINDING PROTEIN 4, PLASMA                                         |
| 202260_s_at | 2.05E-04 | 0.2683 | STXBP1   | SYNTAXIN BINDING PROTEIN 1                                                |
| 210381_s_at | 1.78E-04 | 0.2694 | CCKBR    | CHOLECYSTOKININ B RECEPTOR                                                |
| 205691_at   | 9.86E-05 | 0.2695 | SYNGR3   | SYNAPTOGYRIN 3                                                            |
| 213245_at   | 1.10E-04 | 0.2696 | ADCY1    | ADENYLATE CYCLASE 1 (BRAIN)                                               |
| 215116_s_at | 4.44E-05 | 0.2708 | DNM1     | DYNAMIN 1                                                                 |
| 213268_at   | 5.25E-04 | 0.2710 | CAMTA1   | CALMODULIN BINDING TRANSCRIPTION ACTIVATOR 1                              |
| 212877_at   | 4.79E-04 | 0.2712 | KNS2     | KINESIN 2                                                                 |
| 205827_at   | 8.57E-04 | 0.2714 | CCK      | CHOLECYSTOKININ                                                           |
| 204365_s_at | 2.05E-04 | 0.2716 | REEP1    | RECEPTOR ACCESSORY PROTEIN 1                                              |
| 213636_at   | 2.81E-04 | 0.2731 | KIAA1045 | KIAA1045                                                                  |
| 212930_at   | 6.83E-05 | 0.2734 | ATP2B1   | ATPASE, CA <sup>++</sup> TRANSPORTING, PLASMA MEMBRANE 1                  |
| 205325_at   | 8.56E-06 | 0.2739 | PHYHIP   | PHYTANOYL-COA 2-HYDROXYLASE INTERACTING PROTEIN                           |
| 204141_at   | 1.11E-04 | 0.2742 | TUBB2A   | TUBULIN, BETA 2A                                                          |
| 208002_s_at | 2.04E-04 | 0.2753 | ACOT7    | ACYL-COA THIOESTERASE 7                                                   |
| 206780_at   | 4.11E-04 | 0.2754 | GAD2     | GLUTAMATE DECARBOXYLASE 2 (PANCREATIC ISLETS AND BRAIN, 65KDA)            |
| 209200_at   | 3.20E-04 | 0.2755 | MEF2C    | MADS BOX TRANSCRIPTION ENHANCER FACTOR 2, POLYPEPTIDE C (MYOCYTE ENHAN... |
| 218332_at   | 1.93E-04 | 0.2765 | BEX1     | BRAIN EXPRESSED, X-LINKED 1                                               |
| 217128_s_at | 2.41E-04 | 0.2767 | CAMK1G   | CALCIUM/CALMODULIN-DEPENDENT PROTEIN KINASE IG                            |
| 211071_s_at | 1.85E-04 | 0.2775 | MLLT11   | MYELOID/LYMPHOID OR MIXED-LINEAGE LEUKEMIA (TRITHORAX HOMOLOG, DROSOPH... |
| 218623_at   | 1.67E-04 | 0.2792 | HMP19    | HMP19 PROTEIN                                                             |
| 208851_s_at | 6.11E-05 | 0.2807 | THY1     | THY-1 CELL SURFACE ANTIGEN                                                |
| 205348_s_at | 9.67E-04 | 0.2810 | DYNC111  | DYNEIN, CYTOPLASMIC 1, INTERMEDIATE CHAIN 1                               |
| 204743_at   | 2.25E-04 | 0.2810 | TAGLN3   | TRANSGELIN 3                                                              |
| 205352_at   | 7.11E-04 | 0.2822 | SERPINI1 | SERPIN PEPTIDASE INHIBITOR, CLADE I (NEUROSERPIN), MEMBER 1               |
| 204229_at   | 1.21E-04 | 0.2825 | SLC17A7  | SOLUTE CARRIER FAMILY 17 (SODIUM-DEPENDENT INORGANIC PHOSPHATE COTRANS... |
| 202438_x_at | 3.30E-04 | 0.2827 | IDS      | IDURONATE 2-SULFATASE (HUNTER SYNDROME)                                   |
| 212976_at   | 6.88E-05 | 0.2834 | LRRC8B   | LEUCINE RICH REPEAT CONTAINING 8 FAMILY, MEMBER B                         |
| 213927_at   | 2.46E-04 | 0.2847 | MAP3K9   | MITOGEN-ACTIVATED PROTEIN KINASE KINASE KINASE 9                          |
| 213496_at   | 1.40E-04 | 0.2847 | LPPR4    | PLASTICITY RELATED GENE 1                                                 |
| 206448_at   | 9.36E-04 | 0.2858 | ZNF365   | ZINC FINGER PROTEIN 365                                                   |
| 210227_at   | 1.49E-05 | 0.2867 | DLGAP2   | DISCS, LARGE (DROSOPHILA) HOMOLOG-ASSOCIATED PROTEIN 2                    |
| 207548_at   | 1.70E-06 | 0.2869 | GRM7     | GLUTAMATE RECEPTOR, METABOTROPIC 7                                        |
| 204945_at   | 7.16E-05 | 0.2874 | PTPRN    | PROTEIN TYROSINE PHOSPHATASE, RECEPTOR TYPE, N                            |
| 219532_at   | 1.18E-04 | 0.2877 | ELOVL4   | ELONGATION OF VERY LONG CHAIN FATTY ACIDS (FEN1/ELO2, SUR4/ELO3, YEAST... |
| 213558_at   | 8.85E-05 | 0.2880 | PCLO     | PICCOLO (PRESYNAPTIC CYTOMATRIX PROTEIN)                                  |
| 204586_at   | 7.60E-05 | 0.2881 | BSN      | BASSOON (PRESYNAPTIC CYTOMATRIX PROTEIN)                                  |
| 209598_at   | 1.64E-04 | 0.2886 | PNMA2    | PARANEOPlastic ANTIGEN MA2                                                |
| 215143_at   | 2.00E-04 | 0.2896 | FLJ36166 | HYPOTHETICAL PROTEIN FLJ36166                                             |

|             |          |        |               |                                                                           |
|-------------|----------|--------|---------------|---------------------------------------------------------------------------|
| 204081_at   | 2.17E-04 | 0.2898 | NRGN          | NEUROGRANIN (PROTEIN KINASE C SUBSTRATE, RC3)                             |
| 202712_s_at | 3.32E-04 | 0.2901 | CKMT1A/CKMT1B | CREATINE KINASE, MITOCHONDRIAL 1B                                         |
| 218720_x_at | 3.36E-04 | 0.2902 | SEZ6L2        | SEIZURE RELATED 6 HOMOLOG (MOUSE)-LIKE 2                                  |
| 205850_s_at | 3.58E-04 | 0.2942 | GABRB3        | GAMMA-AMINOBUTYRIC ACID (GABA) A RECEPTOR, BETA 3                         |
| 204749_at   | 4.18E-04 | 0.2951 | NAP1L3        | NUCLEOSOME ASSEMBLY PROTEIN 1-LIKE 3                                      |
| 208121_s_at | 8.45E-04 | 0.2961 | PTPRO         | PROTEIN TYROSINE PHOSPHATASE, RECEPTOR TYPE, O                            |
| 216963_s_at | 1.94E-05 | 0.2961 | GAP43         | GROWTH ASSOCIATED PROTEIN 43                                              |
| 215267_s_at | 2.55E-05 | 0.2962 | SLC8A2        | SOLUTE CARRIER FAMILY 8 (SODIUM-CALCIUM EXCHANGER), MEMBER 2              |
| 210781_x_at | 1.22E-04 | 0.2965 | GRIN1         | GLUTAMATE RECEPTOR, IONOTROPIC, N-METHYL D-ASPARTATE 1                    |
| 214120_at   | 1.66E-04 | 0.2988 | RFPL1S        | RET FINGER PROTEIN-LIKE 1 ANTISENSE                                       |
| 210650_s_at | 8.40E-04 | 0.2995 | PCLO          | PICCOLO (PRESYNAPTIC CYTOMATRIX PROTEIN)                                  |
| 203264_s_at | 2.00E-04 | 0.2996 | ARHGEF9       | CDC42 GUANINE NUCLEOTIDE EXCHANGE FACTOR (GEF) 9                          |
| 219497_s_at | 3.51E-04 | 0.3003 | BCL11A        | B-CELL CLL/LYMPHOMA 11A (ZINC FINGER PROTEIN)                             |
| 214596_at   | 8.33E-05 | 0.3012 | CHRM3         | CHOLINERGIC RECEPTOR, MUSCARINIC 3                                        |
| 218273_s_at | 2.95E-04 | 0.3020 | PPM2C         | PROTEIN PHOSPHATASE 2C, MAGNESIUM-DEPENDENT, CATALYTIC SUBUNIT            |
| 214217_at   | 3.10E-04 | 0.3026 | GRM5          | GLUTAMATE RECEPTOR, METABOTROPIC 5                                        |
| 209159_s_at | 2.38E-04 | 0.3026 | NDRG4         | NDRG FAMILY MEMBER 4                                                      |
| 201313_at   | 5.91E-05 | 0.3038 | ENO2          | ENOLASE 2 (GAMMA, NEURONAL)                                               |
| 206161_s_at | 1.49E-04 | 0.3040 | SYT5          | SYNAPTOTAGMIN V                                                           |
| 210015_s_at | 7.59E-04 | 0.3054 | MAP2          | MICROTUBULE-ASSOCIATED PROTEIN 2                                          |
| 220030_at   | 3.46E-05 | 0.3056 | STYK1         | SERINE/THREONINE/TYROSINE KINASE 1                                        |
| 211679_x_at | 2.92E-05 | 0.3057 | GABBR2        | GAMMA-AMINOBUTYRIC ACID (GABA) B RECEPTOR, 2                              |
| 37566_at    | 2.95E-04 | 0.3058 | KIAA1045      | KIAA1045                                                                  |
| 203607_at   | 3.80E-04 | 0.3062 | INPP5F        | INOSITOL POLYPHOSPHATE-5-PHOSPHATASE F                                    |
| 214293_at   | 2.08E-04 | 0.3064 | 11-Sep        | SEPTIN 11                                                                 |
| 213308_at   | 2.68E-04 | 0.3078 | SHANK2        | SH3 AND MULTIPLE ANKYRIN REPEAT DOMAINS 2                                 |
| 219073_s_at | 2.69E-04 | 0.3083 | OSBPL10       | HYPOTHETICAL PROTEIN FLJ20363                                             |
| 204506_at   | 5.21E-04 | 0.3083 | PPP3R1        | PROTEIN PHOSPHATASE 3 (FORMERLY 2B), REGULATORY SUBUNIT B, 19KDA, ALPH... |
| 206773_at   | 4.58E-05 | 0.3086 | LY6H          | LYMPHOCYTE ANTIGEN 6 COMPLEX, LOCUS H                                     |
| 219937_at   | 5.85E-04 | 0.3090 | TRHDE         | THYROTROPIN-RELEASING HORMONE DEGRADING ENZYME                            |
| 205795_at   | 5.16E-05 | 0.3092 | NRXN3         | NEUREXIN 3                                                                |
| 204793_at   | 2.67E-04 | 0.3113 | GPRASP1       | G PROTEIN-COUPLED RECEPTOR ASSOCIATED SORTING PROTEIN 1                   |
| 202154_x_at | 2.62E-05 | 0.3133 | TUBB3/MC1R    | MELANOCORTIN 1 RECEPTOR (ALPHA MELANOCYTE STIMULATING HORMONE RECEPTOR... |
| 201962_s_at | 9.27E-05 | 0.3133 | RNF41         | RING FINGER PROTEIN 41                                                    |
| 204762_s_at | 7.87E-04 | 0.3147 | GNAO1         | GUANINE NUCLEOTIDE BINDING PROTEIN (G PROTEIN), ALPHA ACTIVATING ACTIV... |
| 208321_s_at | 8.63E-05 | 0.3158 | CABP1         | CALCIUM BINDING PROTEIN 1 (CALBRAIN)                                      |
| 205744_at   | 3.30E-05 | 0.3159 | DOC2A         | DOUBLE C2-LIKE DOMAINS, ALPHA                                             |
| 222005_s_at | 3.09E-04 | 0.3168 | GNG3          | GUANINE NUCLEOTIDE BINDING PROTEIN (G PROTEIN), GAMMA 3                   |
| 219659_at   | 4.01E-04 | 0.3181 | ATP8A2        | ATPASE, AMINOPHOSPHOLIPID TRANSPORTER-LIKE, CLASS I, TYPE 8A, MEMBER 2    |
| 213222_at   | 2.75E-04 | 0.3183 | PLCB1         | PHOSPHOLIPASE C, BETA 1 (PHOSPHOINOSITIDE-SPECIFIC)                       |

|             |          |        |            |                                                                            |
|-------------|----------|--------|------------|----------------------------------------------------------------------------|
| 204165_at   | 1.54E-04 | 0.3201 | WASF1      | WAS PROTEIN FAMILY, MEMBER 1                                               |
| 212473_s_at | 1.81E-05 | 0.3201 | MICAL2     | MICROTUBULE ASSOCIATED MONOOXYGENASE, CALPONIN AND LIM DOMAIN CONTAININ... |
| 209556_at   | 2.39E-05 | 0.3203 | NCDN       | NEUROCHONDRIN                                                              |
| 220131_at   | 3.03E-04 | 0.3225 | FXYP7      | FXYP DOMAIN CONTAINING ION TRANSPORT REGULATOR 7                           |
| 206233_at   | 5.12E-04 | 0.3226 | B4GALT6    | UDP-GAL:BETAGLCNAC BETA 1,4-GALACTOSYLTRANSFERASE, POLYPEPTIDE 6           |
| 205549_at   | 6.51E-04 | 0.3233 | PCP4       | PURKINJE CELL PROTEIN 4                                                    |
| 204718_at   | 1.09E-04 | 0.3239 | EPHB6      | EPH RECEPTOR B6                                                            |
| 213666_at   | 1.20E-04 | 0.3241 | 6-Sep      | SEPTIN 6                                                                   |
| 208850_s_at | 3.35E-04 | 0.3246 | THY1       | THY-1 CELL SURFACE ANTIGEN                                                 |
| 206045_s_at | 6.26E-06 | 0.3253 | NOL4       | NUCLEOLAR PROTEIN 4                                                        |
| 204592_at   | 5.46E-05 | 0.3277 | DLG4       | DISCS, LARGE HOMOLOG 4 (DROSOPHILA)                                        |
| 213476_x_at | 4.61E-05 | 0.3280 | MC1R/TUBB3 | MELANOCORTIN 1 RECEPTOR (ALPHA MELANOCYTE STIMULATING HORMONE RECEPTOR...  |
| 213131_at   | 2.01E-04 | 0.3283 | OLFM1      | OLFACTOMEDIN 1                                                             |
| 205531_s_at | 1.08E-04 | 0.3284 | GLS2       | GLUTAMINASE 2 (LIVER, MITOCHONDRIAL)                                       |
| 206253_at   | 8.55E-04 | 0.3289 | DLG2       | DISCS, LARGE HOMOLOG 2, CHAPSYN-110 (DROSOPHILA)                           |
| 205031_at   | 1.44E-04 | 0.3290 | EFNB3      | EPHRIN-B3                                                                  |
| 214111_at   | 3.28E-05 | 0.3295 | OPCML      | OPIOID BINDING PROTEIN/CELL ADHESION MOLECULE-LIKE                         |
| 205948_at   | 1.64E-04 | 0.3296 | PTPRT      | PROTEIN TYROSINE PHOSPHATASE, RECEPTOR TYPE, T                             |
| 206162_x_at | 5.25E-05 | 0.3303 | SYT5       | SYNAPTOTAGMIN V                                                            |
| 216944_s_at | 5.98E-04 | 0.3304 | ITPR1      | INOSITOL 1,4,5-TRIPHOSPHATE RECEPTOR, TYPE 1                               |
| 214978_s_at | 4.38E-04 | 0.3317 | PPFIA4     | PROTEIN TYROSINE PHOSPHATASE, RECEPTOR TYPE, F POLYPEPTIDE (PTPRF), IN...  |
| 52837_at    | 3.92E-04 | 0.3318 | KIAA1644   | KIAA1644 PROTEIN                                                           |
| 204546_at   | 7.09E-05 | 0.3324 | KIAA0513   | KIAA0513                                                                   |
| 221874_at   | 2.13E-04 | 0.3325 | KIAA1324   | KIAA1324                                                                   |
| 206280_at   | 9.86E-05 | 0.3328 | CDH18      | CADHERIN 18, TYPE 2                                                        |
| 219734_at   | 1.40E-05 | 0.3339 | SIDT1      | SID1 TRANSMEMBRANE FAMILY, MEMBER 1                                        |
| 211125_x_at | 7.74E-05 | 0.3365 | GRIN1      | GLUTAMATE RECEPTOR, IONOTROPIC, N-METHYL D-ASPARTATE 1                     |
| 214078_at   | 1.88E-04 | 0.3377 | PAK3       | P21 (CDKN1A)-ACTIVATED KINASE 3                                            |
| 205899_at   | 5.07E-04 | 0.3385 | CCNA1      | CYCLIN A1                                                                  |
| 206381_at   | 3.70E-04 | 0.3386 | SCN2A2     | SODIUM CHANNEL, VOLTAGE-GATED, TYPE II, ALPHA 2                            |
| 213338_at   | 2.47E-04 | 0.3389 | RIS1       | RAS-INDUCED SENESCENCE 1                                                   |
| 213967_at   | 2.03E-04 | 0.3396 | LOC138046  | HYPOTHETICAL PROTEIN LOC138046                                             |
| 200623_s_at | 2.61E-04 | 0.3403 | CALM1/2/3  | CALMODULIN 1 (PHOSPHORYLASE KINASE, DELTA)                                 |
| 221727_at   | 1.71E-04 | 0.3404 | SUB1/NA    | SUB1 HOMOLOG (S. CEREVISIAE)                                               |
| 205277_at   | 2.12E-04 | 0.3408 | PRDM2      | PR DOMAIN CONTAINING 2, WITH ZNF DOMAIN                                    |
| 212990_at   | 1.41E-04 | 0.3409 | SYNJ1      | SYNAPTOJANIN 1                                                             |
| 212559_at   | 4.66E-05 | 0.3418 | PRKAR1B    | PROTEIN KINASE, CAMP-DEPENDENT, REGULATORY, TYPE I, BETA                   |
| 214044_at   | 3.38E-04 | 0.3419 | RYR2       | RYANODINE RECEPTOR 2 (CARDIAC)                                             |
| 202391_at   | 4.96E-05 | 0.3427 | BASP1      | BRAIN ABUNDANT, MEMBRANE ATTACHED SIGNAL PROTEIN 1                         |
| 207035_at   | 4.90E-05 | 0.3452 | SLC30A3    | SOLUTE CARRIER FAMILY 30 (ZINC TRANSPORTER), MEMBER 3                      |
| 213904_at   | 2.37E-05 | 0.3453 | NA         | .CONSENSUS INCLUDES GB:AL390170.1 /DEF=HOMO SAPIENS MRNA; CDNA DKFZP54     |
| 219461_at   | 1.81E-04 | 0.3454 | PAK6       | P21(CDKN1A)-ACTIVATED KINASE 6                                             |

|             |          |        |          |                                                                           |
|-------------|----------|--------|----------|---------------------------------------------------------------------------|
| 205268_s_at | 8.96E-04 | 0.3459 | ADD2     | ADDUCIN 2 (BETA)                                                          |
| 219877_at   | 7.10E-05 | 0.3477 | ZMAT4    | ZINC FINGER, MATRIN TYPE 4                                                |
| 59697_at    | 5.56E-05 | 0.3488 | RAB15    | RAB15, MEMBER RAS ONCOGENE FAMILY                                         |
| 220999_s_at | 1.60E-04 | 0.3491 | CYFIP2   | CYTOPLASMIC FMR1 INTERACTING PROTEIN 2                                    |
| 213869_x_at | 7.20E-05 | 0.3495 | THY1     | THY-1 CELL SURFACE ANTIGEN                                                |
| 204467_s_at | 1.06E-04 | 0.3500 | SNCA     | SYNUCLEIN, ALPHA (NON A4 COMPONENT OF AMYLOID PRECURSOR)                  |
| 214376_at   | 1.95E-04 | 0.3504 | NA       | ,CONSENSUS INCLUDES GB:A1263044 /FEA=EST /DB_XREF=GI:3871247 /DB_XREF=    |
| 203069_at   | 1.31E-04 | 0.3504 | SV2A     | SYNAPTIC VESICLE GLYCOPROTEIN 2A                                          |
| 203110_at   | 1.20E-05 | 0.3508 | PTK2B    | PTK2B PROTEIN TYROSINE KINASE 2 BETA                                      |
| 212624_s_at | 2.38E-04 | 0.3510 | CHN1     | CHIMERIN (CHIMAERIN) 1                                                    |
| 219032_x_at | 1.21E-04 | 0.3513 | OPN3     | OP SIN 3 (ENCEPHALOPSIN, PANOPSIN)                                        |
| 205454_at   | 7.46E-05 | 0.3518 | HPCA     | HIPPOCALCIN                                                               |
| 214285_at   | 3.59E-04 | 0.3521 | FABP3    | FATTY ACID BINDING PROTEIN 3, MUSCLE AND HEART (MAMMARY-DERIVED GROWTH... |
| 217979_at   | 4.64E-04 | 0.3523 | TSPAN13  | TETRASPANIN 13                                                            |
| 211597_s_at | 4.27E-06 | 0.3529 | HOP      | HOMEODOMAIN-ONLY PROTEIN                                                  |
| 209683_at   | 1.52E-04 | 0.3536 | FAM49A   | FAMILY WITH SEQUENCE SIMILARITY 49, MEMBER A                              |
| 212751_at   | 6.89E-05 | 0.3544 | UBE2N    | UBIQUITIN-CONJUGATING ENZYME E2N (UBC13 HOMOLOG, YEAST)                   |
| 204679_at   | 1.53E-04 | 0.3552 | KCNK1    | POTASSIUM CHANNEL, SUBFAMILY K, MEMBER 1                                  |
| 202206_at   | 3.63E-04 | 0.3554 | ARL4C    | ADP-RIBOSYLATION FACTOR-LIKE 4C                                           |
| 214772_at   | 6.82E-04 | 0.3566 | C11ORF41 | CHROMOSOME 11 OPEN READING FRAME 41                                       |
| 220246_at   | 4.54E-04 | 0.3567 | CAMK1D   | CALCIUM/CALMODULIN-DEPENDENT PROTEIN KINASE ID                            |
| 221236_s_at | 2.16E-04 | 0.3570 | STMN4    | STATHMIN-LIKE 4                                                           |
| 205915_x_at | 4.53E-04 | 0.3580 | GRIN1    | GLUTAMATE RECEPTOR, IONOTROPIC, N-METHYL D-ASPARTATE 1                    |
| 208359_s_at | 5.93E-05 | 0.3583 | KCNJ4    | POTASSIUM INWARDLY-RECTIFYING CHANNEL, SUBFAMILY J, MEMBER 4              |
| 203911_at   | 8.98E-05 | 0.3585 | RAP1GA1  | RAP1, GTPASE ACTIVATING PROTEIN 1                                         |
| 205414_s_at | 5.87E-04 | 0.3595 | KIAA0672 | KIAA0672 GENE PRODUCT                                                     |
| 202540_s_at | 3.32E-04 | 0.3597 | HMGCR    | 3-HYDROXY-3-METHYLGLUTARYL-COENZYME A REDUCTASE                           |
| 205721_at   | 1.95E-06 | 0.3597 | GFRA2    | GDNF FAMILY RECEPTOR ALPHA 2                                              |
| 219425_at   | 5.66E-05 | 0.3598 | SULT4A1  | SULFOTRANSFERASE FAMILY 4A, MEMBER 1                                      |
| 215021_s_at | 9.22E-04 | 0.3600 | NRXN3    | NEUREXIN 3                                                                |
| 209685_s_at | 2.33E-05 | 0.3605 | PRKCB1   | PROTEIN KINASE C, BETA 1                                                  |
| 206850_at   | 1.33E-04 | 0.3610 | RRP22    | RAS-RELATED ON CHROMOSOME 22                                              |
| 219671_at   | 8.37E-05 | 0.3613 | HPCAL4   | HIPPOCALCIN LIKE 4                                                        |
| 202016_at   | 2.33E-05 | 0.3620 | MEST     | MESODERM SPECIFIC TRANSCRIPT HOMOLOG (MOUSE)                              |
| 219389_at   | 2.93E-04 | 0.3643 | SUSD4    | SUSHI DOMAIN CONTAINING 4                                                 |
| 202178_at   | 1.13E-04 | 0.3645 | PRKCZ    | PROTEIN KINASE C, ZETA                                                    |
| 213452_at   | 2.58E-05 | 0.3660 | ZNF184   | ZINC FINGER PROTEIN 184 (KRUPPEL-LIKE)                                    |
| 207026_s_at | 7.76E-04 | 0.3667 | ATP2B3   | ATPASE, CA <sup>++</sup> TRANSPORTING, PLASMA MEMBRANE 3                  |
| 218953_s_at | 3.99E-04 | 0.3668 | MGC3265  | HYPOTHETICAL PROTEIN MGC3265                                              |
| 206196_s_at | 3.56E-05 | 0.3676 | RRIP8    | RAP2 INTERACTING PROTEIN 8                                                |
| 209597_s_at | 6.70E-04 | 0.3680 | PNMA2    | PARANEOPlastic ANTIGEN MA2                                                |
| 219301_s_at | 3.91E-04 | 0.3700 | CNTNAP2  | CONTACTIN ASSOCIATED PROTEIN-LIKE 2                                       |
| 212699_at   | 2.69E-05 | 0.3700 | SCAMP5   | SECRETORY CARRIER MEMBRANE PROTEIN 5                                      |
| 203909_at   | 5.04E-05 | 0.3717 | SLC9A6   | SOLUTE CARRIER FAMILY 9 (SODIUM/HYDROGEN EXCHANGER), MEMBER 6             |

|             |          |        |               |                                                                                                          |
|-------------|----------|--------|---------------|----------------------------------------------------------------------------------------------------------|
| 213307_at   | 5.18E-05 | 0.3720 | SHANK2        | SH3 AND MULTIPLE ANKYRIN REPEAT DOMAINS 2                                                                |
| 205874_at   | 1.75E-04 | 0.3733 | ITPKA         | INOSITOL 1,4,5-TRISPHOSPHATE 3-KINASE A                                                                  |
| 214735_at   | 1.65E-04 | 0.3734 | PIP3-E        | PHOSPHOINOSITIDE-BINDING PROTEIN PIP3-E                                                                  |
| 221810_at   | 1.63E-05 | 0.3741 | RAB15         | RAB15, MEMBER RAS ONCOGENE FAMILY                                                                        |
| 206489_s_at | 4.31E-04 | 0.3749 | DLGAP1        | DISCS, LARGE (DROSOPHILA) HOMOLOG-ASSOCIATED PROTEIN 1                                                   |
| 213172_at   | 6.99E-04 | 0.3752 | TTC9          | TETRATRICOPEPTIDE REPEAT DOMAIN 9                                                                        |
| 212252_at   | 2.20E-04 | 0.3761 | CAMKK2        | CALCIUM/CALMODULIN-DEPENDENT PROTEIN KINASE KINASE 2, BETA                                               |
| 215052_at   | 1.97E-05 | 0.3773 | FRMPD4        | FERM AND PDZ DOMAIN CONTAINING 4                                                                         |
| 221865_at   | 9.85E-04 | 0.3784 | C9ORF91       | CHROMOSOME 9 OPEN READING FRAME 91                                                                       |
| 207789_s_at | 3.01E-05 | 0.3787 | DPP6          | DIPEPTIDYL-PEPTIDASE 6                                                                                   |
| 214157_at   | 8.48E-04 | 0.3802 | GNAS          | GNAS COMPLEX LOCUS                                                                                       |
| 206084_at   | 4.83E-04 | 0.3804 | PTPRR         | PROTEIN TYROSINE PHOSPHATASE, RECEPTOR TYPE, R                                                           |
| 209557_s_at | 5.18E-04 | 0.3804 | NCDN          | NEUROCHONDRIN                                                                                            |
| 205591_at   | 5.21E-05 | 0.3804 | OLFM1         | OLFACTOMEDIN 1                                                                                           |
| 219894_at   | 8.35E-05 | 0.3819 | MAGEL2        | MAGE-LIKE 2                                                                                              |
| 218824_at   | 8.87E-04 | 0.3820 | FLJ10781      | HYPOTHETICAL PROTEIN FLJ10781                                                                            |
| 216073_at   | 9.24E-04 | 0.3825 | LOC390616     | SIMILAR TO RIKEN CDNA B230218L05 GENE                                                                    |
| 206281_at   | 4.71E-04 | 0.3847 | ADCYAP1       | ADENYLATE CYCLASE ACTIVATING POLYPEPTIDE 1 (PITUITARY)                                                   |
| 219528_s_at | 2.03E-05 | 0.3849 | BCL11B        | B-CELL CLL/LYMPHOMA 11B (ZINC FINGER PROTEIN)                                                            |
| 221792_at   | 2.02E-04 | 0.3850 | RAB6B         | RAB6B, MEMBER RAS ONCOGENE FAMILY                                                                        |
| 212448_at   | 1.74E-05 | 0.3852 | NEDD4L        | NEURAL PRECURSOR CELL EXPRESSED, DEVELOPMENTALLY DOWN-REGULATED 4-LIKE                                   |
| 218888_s_at | 7.89E-04 | 0.3853 | NETO2         | HYPOTHETICAL PROTEIN FLJ10430                                                                            |
| 204237_at   | 2.59E-04 | 0.3856 | GULP1         | GULP, ENGULFMENT ADAPTOR PTB DOMAIN CONTAINING 1                                                         |
| 203861_s_at | 4.67E-05 | 0.3883 | ACTN2         | ACTININ, ALPHA 2                                                                                         |
| 218324_s_at | 2.96E-05 | 0.3890 | SPATS2        | SPERMATOGENESIS ASSOCIATED, SERINE-RICH 2                                                                |
| 220334_at   | 1.53E-05 | 0.3893 | RGS17         | REGULATOR OF G-PROTEIN SIGNALLING 17                                                                     |
| 209186_at   | 2.17E-04 | 0.3896 | ATP2A2        | ATPASE, CA <sup>++</sup> TRANSPORTING, CARDIAC MUSCLE, SLOW TWITCH 2                                     |
| 204729_s_at | 7.51E-04 | 0.3899 | STX1A         | SYNTAXIN 1A (BRAIN)                                                                                      |
| 212555_at   | 6.73E-04 | 0.3914 | PRKAR1B       | PROTEIN KINASE, CAMP-DEPENDENT, REGULATORY, TYPE I, BETA                                                 |
| 212446_s_at | 6.26E-04 | 0.3916 | LASS6         | LAG1 LONGEVITY ASSURANCE HOMOLOG 6 (S. CEREVISIAE)                                                       |
| 212215_at   | 3.31E-04 | 0.3916 | PREPL         | PROLYL ENDOPEPTIDASE-LIKE                                                                                |
| 202754_at   | 5.86E-05 | 0.3923 | R3HDM1        | R3H DOMAIN CONTAINING 1                                                                                  |
| 217930_s_at | 6.21E-04 | 0.3923 | TOLLIP        | TOLL INTERACTING PROTEIN                                                                                 |
| 206857_s_at | 9.29E-05 | 0.3927 | FKBP1B        | FK506 BINDING PROTEIN 1B, 12.6 KDA                                                                       |
| 212701_at   | 6.28E-05 | 0.3927 | TLN2          | TALIN 2                                                                                                  |
| 212801_at   | 9.19E-05 | 0.3931 | CIT           | CITRON (RHO-INTERACTING, SERINE/THREONINE KINASE 21)                                                     |
| 208906_at   | 2.75E-04 | 0.3936 | BSCL2/HNRPUL2 | BERNARDINELLI-SEIP CONGENITAL LIPODYSTROPHY 2 (SEIPIN), HETEROGENEOUS NUCLEAR RIBONUCLEOPROTEIN U-LIKE 2 |
| 214607_at   | 2.80E-05 | 0.3941 | PAK3          | P21 (CDKN1A)-ACTIVATED KINASE 3                                                                          |
| 219400_at   | 7.59E-04 | 0.3946 | CNTNAP1       | CONTACTIN ASSOCIATED PROTEIN 1                                                                           |
| 204591_at   | 5.33E-04 | 0.3947 | CHL1          | CELL ADHESION MOLECULE WITH HOMOLOGY TO L1CAM (CLOSE HOMOLOG OF L1)                                      |
| 205294_at   | 5.11E-06 | 0.3962 | BAIAP2        | BAII-ASSOCIATED PROTEIN 2                                                                                |
| 213484_at   | 4.49E-04 | 0.3966 | NA            | .CONSENSUS INCLUDES GB:AI097640 /FEA=EST /DB_XREF=GI:3445898 /DB_XREF=                                   |

|             |          |        |          |                                                                            |
|-------------|----------|--------|----------|----------------------------------------------------------------------------|
| 210347_s_at | 3.53E-04 | 0.3975 | BCL11A   | B-CELL CLL/LYMPHOMA 11A (ZINC FINGER PROTEIN)                              |
| 213793_s_at | 2.02E-04 | 0.3978 | HOMER1   | HOMER HOMOLOG 1 (DROSOPHILA)                                               |
| 213009_s_at | 1.89E-04 | 0.3980 | TRIM37   | TRIPARTITE MOTIF-CONTAINING 37                                             |
| 219365_s_at | 5.18E-04 | 0.3984 | CAMKV    | CAM KINASE-LIKE VESICLE-ASSOCIATED                                         |
| 219549_s_at | 4.79E-04 | 0.3994 | RTN3     | RETICULON 3                                                                |
| 215543_s_at | 4.45E-04 | 0.4001 | LARGE    | LIKE-GLYCOSYLTRANSFERASE                                                   |
| 220235_s_at | 8.63E-05 | 0.4004 | C1ORF103 | CHROMOSOME 1 OPEN READING FRAME 103                                        |
| 206404_at   | 9.04E-04 | 0.4006 | FGF9     | FIBROBLAST GROWTH FACTOR 9 (GLIA-ACTIVATING FACTOR)                        |
| 221493_at   | 2.57E-04 | 0.4006 | TSPYL1   | TSPY-LIKE 1                                                                |
| 213386_at   | 9.38E-04 | 0.4007 | C9ORF125 | CHROMOSOME 9 OPEN READING FRAME 125                                        |
| 212508_at   | 1.30E-04 | 0.4008 | MOAP1    | MODULATOR OF APOPTOSIS 1                                                   |
| 206976_s_at | 3.56E-04 | 0.4013 | HSPH1    | HEAT SHOCK 105KDA/110KDA PROTEIN 1                                         |
| 218751_s_at | 7.75E-06 | 0.4018 | FBXW7    | F-BOX AND WD-40 DOMAIN PROTEIN 7 (ARCHIPELAGO HOMOLOG, DROSOPHILA)         |
| 218434_s_at | 2.97E-04 | 0.4037 | AACS     | ACETOACETYL-COA SYNTHETASE                                                 |
| 202439_s_at | 1.89E-04 | 0.4041 | IDS      | IDURONATE 2-SULFATASE (HUNTER SYNDROME)                                    |
| 200734_s_at | 1.49E-04 | 0.4048 | ARF3     | ADP-RIBOSYLATION FACTOR 3                                                  |
| 213108_at   | 3.40E-04 | 0.4049 | CAMK2A   | CALCIUM/CALMODULIN-DEPENDENT PROTEIN KINASE (CAM KINASE) II ALPHA          |
| 204375_at   | 4.49E-05 | 0.4059 | CLSTN3   | CALSINTENIN 3                                                              |
| 63305_at    | 5.57E-04 | 0.4064 | PKNOX2   | PBX/KNOTTED 1 HOMEODOMAIN 2                                                |
| 207693_at   | 4.88E-05 | 0.4064 | CACNB4   | CALCIUM CHANNEL, VOLTAGE-DEPENDENT, BETA 4 SUBUNIT                         |
| 218725_at   | 3.90E-05 | 0.4081 | SLC25A22 | SOLUTE CARRIER FAMILY 25 (MITOCHONDRIAL CARRIER: GLUTAMATE), MEMBER 22     |
| 208051_s_at | 3.96E-04 | 0.4084 | PAIP1    | POLY(A) BINDING PROTEIN INTERACTING PROTEIN 1                              |
| 209635_at   | 8.97E-05 | 0.4094 | AP1S1    | ADAPTOR-RELATED PROTEIN COMPLEX 1, SIGMA 1 SUBUNIT                         |
| 215149_at   | 2.02E-04 | 0.4113 | NA       | .CONSENSUS INCLUDES GB:AF052109.1 /DEF=HOMO SAPIENS CLONE 23927 MRNA S     |
| 214436_at   | 4.85E-05 | 0.4119 | FBXL2    | F-BOX AND LEUCINE-RICH REPEAT PROTEIN 2                                    |
| 206014_at   | 1.45E-04 | 0.4121 | ACTL6B   | ACTIN-LIKE 6B                                                              |
| 202432_at   | 8.11E-04 | 0.4125 | PPP3CB   | PROTEIN PHOSPHATASE 3 (FORMERLY 2B), CATALYTIC SUBUNIT, BETA ISOFORM (...) |
| 206322_at   | 6.63E-04 | 0.4157 | SYN3     | SYNAPSIN III                                                               |
| 208308_s_at | 2.59E-04 | 0.4158 | GPI      | GLUCOSE PHOSPHATE ISOMERASE                                                |
| 212928_at   | 1.16E-04 | 0.4158 | TSPYL4   | TSPY-LIKE 4                                                                |
| 218952_at   | 5.71E-04 | 0.4159 | PCSK1N   | PROPROTEIN CONVERTASE SUBTILISIN/KEXIN TYPE 1 INHIBITOR                    |
| 215716_s_at | 1.07E-04 | 0.4164 | ATP2B1   | ATPASE, CA <sup>++</sup> TRANSPORTING, PLASMA MEMBRANE 1                   |
| 202192_s_at | 2.26E-04 | 0.4166 | GAS7     | GROWTH ARREST-SPECIFIC 7                                                   |
| 201050_at   | 4.26E-04 | 0.4183 | PLD3     | PHOSPHOLIPASE D FAMILY, MEMBER 3                                           |
| 209064_x_at | 6.99E-04 | 0.4183 | PAIP1    | POLY(A) BINDING PROTEIN INTERACTING PROTEIN 1                              |
| 221931_s_at | 3.98E-04 | 0.4184 | SEH1L    | SEH1-LIKE (S. CEREVISIAE)                                                  |
| 203431_s_at | 8.69E-04 | 0.4185 | RICS     | RHO GTPASE-ACTIVATING PROTEIN                                              |
| 205122_at   | 7.04E-04 | 0.4189 | TMEFF1   | TRANSMEMBRANE PROTEIN WITH EGF-LIKE AND TWO FOLLISTATIN-LIKE DOMAINS 1     |
| 204684_at   | 3.68E-04 | 0.4195 | NPTX1    | NEURONAL PENTRAXIN 1                                                       |
| 213234_at   | 6.46E-04 | 0.4196 | KIAA1467 | KIAA1467                                                                   |
| 203224_at   | 8.60E-05 | 0.4196 | RFK      | RIBOFLAVIN KINASE                                                          |
| 221901_at   | 3.42E-05 | 0.4199 | KIAA1644 | KIAA1644 PROTEIN                                                           |
| 208032_s_at | 3.96E-04 | 0.4213 | GRIA3    | GLUTAMATE RECEPTOR, IONOTROPIC, AMPA 3                                     |

|             |          |        |                        |                                                                           |
|-------------|----------|--------|------------------------|---------------------------------------------------------------------------|
| 203485_at   | 8.85E-05 | 0.4214 | RTN1                   | RETICULON 1                                                               |
| 209956_s_at | 8.29E-04 | 0.4227 | CAMK2B                 | CALCIUM/CALMODULIN-DEPENDENT PROTEIN KINASE (CAM KINASE) II BETA          |
| 205462_s_at | 7.98E-04 | 0.4244 | HPCAL1                 | HIPPOCALCIN-LIKE 1                                                        |
| 216967_at   | 6.28E-04 | 0.4245 | GAP43                  | GROWTH ASSOCIATED PROTEIN 43                                              |
| 203402_at   | 7.10E-04 | 0.4246 | KCNAB2                 | POTASSIUM VOLTAGE-GATED CHANNEL, SHAKER-RELATED SUBFAMILY, BETA MEMBER... |
| 219688_at   | 5.01E-04 | 0.4252 | BBS7                   | BARDET-BIEDL SYNDROME 7                                                   |
| 203680_at   | 2.71E-05 | 0.4257 | PRKAR2B                | PROTEIN KINASE, CAMP-DEPENDENT, REGULATORY, TYPE II, BETA                 |
| 221482_s_at | 8.92E-05 | 0.4260 | ARPP-19                | CYCLIC AMP PHOSPHOPROTEIN, 19 KD                                          |
| 203618_at   | 3.06E-04 | 0.4262 | FAIM2                  | FAS APOPTOTIC INHIBITORY MOLECULE 2                                       |
| 218786_at   | 3.42E-06 | 0.4262 | NT5DC3                 | 5'-NUCLEOTIDASE DOMAIN CONTAINING 3                                       |
| 204584_at   | 5.28E-04 | 0.4267 | L1CAM                  | L1 CELL ADHESION MOLECULE                                                 |
| 210380_s_at | 1.31E-04 | 0.4272 | CACNA1G                | CALCIUM CHANNEL, VOLTAGE-DEPENDENT, ALPHA 1G SUBUNIT                      |
| 207869_s_at | 8.94E-04 | 0.4277 | CACNA1G                | CALCIUM CHANNEL, VOLTAGE-DEPENDENT, ALPHA 1G SUBUNIT                      |
| 219277_s_at | 9.28E-04 | 0.4282 | OGDHL                  | OXOGLUTARATE DEHYDROGENASE-LIKE                                           |
| 212213_x_at | 3.85E-04 | 0.4289 | OPA1                   | OPTIC ATROPHY 1 (AUTOSOMAL DOMINANT)                                      |
| 219225_at   | 8.66E-05 | 0.4290 | PGBD5                  | PIGGYBAC TRANSPOSABLE ELEMENT DERIVED 5                                   |
| 205738_s_at | 4.25E-04 | 0.4291 | FABP3                  | FATTY ACID BINDING PROTEIN 3, MUSCLE AND HEART (MAMMARY-DERIVED GROWTH... |
| 206114_at   | 6.11E-04 | 0.4291 | EPHA4                  | EPH RECEPTOR A4                                                           |
| 203738_at   | 5.32E-04 | 0.4294 | FLJ11193               | HYPOTHETICAL PROTEIN FLJ11193                                             |
| 205293_x_at | 1.35E-04 | 0.4309 | BAIAP2                 | BAI1-ASSOCIATED PROTEIN 2                                                 |
| 201556_s_at | 4.76E-04 | 0.4309 | VAMP2                  | VESICLE-ASSOCIATED MEMBRANE PROTEIN 2 (SYNAPTOBREVIN 2)                   |
| 214023_x_at | 1.31E-04 | 0.4316 | TUBB2B                 | TUBULIN, BETA 2B                                                          |
| 220462_at   | 1.15E-05 | 0.4326 | TAIP-2                 | TGF-BETA INDUCED APOTOSIS PROTEIN 2                                       |
| 218935_at   | 5.14E-04 | 0.4327 | EHD3                   | EH-DOMAIN CONTAINING 3                                                    |
| 210675_s_at | 3.53E-04 | 0.4327 | PTPRR                  | PROTEIN TYROSINE PHOSPHATASE, RECEPTOR TYPE, R                            |
| 215172_at   | 9.43E-04 | 0.4330 | RP11-142117.1/PTP N20A | PROTEIN TYROSINE PHOSPHATASE, NON-RECEPTOR TYPE 20B                       |
| 218613_at   | 2.66E-04 | 0.4335 | PSD3                   | PLECKSTRIN AND SEC7 DOMAIN CONTAINING 3                                   |
| 213045_at   | 2.22E-05 | 0.4338 | MAST3                  | MICROTUBULE ASSOCIATED SERINE/THREONINE KINASE 3                          |
| 203389_at   | 6.81E-04 | 0.4339 | KIF3C                  | KINESIN FAMILY MEMBER 3C                                                  |
| 205590_at   | 8.73E-05 | 0.4340 | RASGRP1                | RAS GUANYL RELEASING PROTEIN 1 (CALCIUM AND DAG-REGULATED)                |
| 206339_at   | 5.98E-04 | 0.4346 | CART                   | COCAINE- AND AMPHETAMINE-REGULATED TRANSCRIPT                             |
| 212233_at   | 1.45E-04 | 0.4354 | MAP1B                  | MICROTUBULE-ASSOCIATED PROTEIN 1B                                         |
| 212552_at   | 7.71E-05 | 0.4362 | HPCAL1                 | HIPPOCALCIN-LIKE 1                                                        |
| 211056_s_at | 2.95E-04 | 0.4370 | SRD5A1                 | STEROID-5-ALPHA-REDUCTASE, ALPHA POLYPEPTIDE 1 (3-OXO-5 ALPHA-STEROID ... |
| 208977_x_at | 5.44E-05 | 0.4377 | TUBB2C                 | TUBULIN, BETA 2C                                                          |
| 214997_at   | 5.90E-04 | 0.4400 | GOLGA1                 | GOLGI AUTOANTIGEN, GOLGIN SUBFAMILY A, 1                                  |
| 218546_at   | 1.62E-04 | 0.4408 | C1ORF115               | CHROMOSOME 1 OPEN READING FRAME 115                                       |
| 210078_s_at | 8.24E-04 | 0.4424 | KCNAB1                 | POTASSIUM VOLTAGE-GATED CHANNEL, SHAKER-RELATED SUBFAMILY, BETA MEMBER... |
| 206215_at   | 3.18E-05 | 0.4435 | OPCML                  | OPIOID BINDING PROTEIN/CELL ADHESION MOLECULE-LIKE                        |
| 203769_s_at | 8.45E-04 | 0.4445 | STS                    | STEROID SULFATASE (MICROSOMAL), ARYLSULFATASE C, ISOZYME S                |
| 218501_at   | 3.64E-04 | 0.4449 | ARHGEF3                | RHO GUANINE NUCLEOTIDE EXCHANGE FACTOR (GEF) 3                            |



|             |          |        |                      |                                                                           |
|-------------|----------|--------|----------------------|---------------------------------------------------------------------------|
| 203855_at   | 3.31E-04 | 0.4450 | WDR47                | WD REPEAT DOMAIN 47                                                       |
| 217992_s_at | 8.85E-04 | 0.4463 | EFHD2                | EF-HAND DOMAIN FAMILY, MEMBER D2                                          |
| 204287_at   | 2.24E-05 | 0.4468 | SYNGR1               | SYNAPTOGYRIN 1                                                            |
| 218259_at   | 5.63E-05 | 0.4484 | MKL2                 | MKL/MYOCARDIN-LIKE 2                                                      |
| 213609_s_at | 6.13E-04 | 0.4487 | SEZ6L                | SEIZURE RELATED GENE 6 (MOUSE)-LIKE                                       |
| 219338_s_at | 3.87E-04 | 0.4491 | LRRC49               | LEUCINE RICH REPEAT CONTAINING 49                                         |
| 204966_at   | 8.35E-04 | 0.4509 | BAI2                 | BRAIN-SPECIFIC ANGIOGENESIS INHIBITOR 2                                   |
| 212372_at   | 1.11E-04 | 0.4511 | MYH10                | MYOSIN, HEAVY POLYPEPTIDE 10, NON-MUSCLE                                  |
| 203745_at   | 8.53E-04 | 0.4515 | HCCS                 | HOLOCYTOCHROME C SYNTHASE (CYTOCHROME C HEME-LYASE)                       |
| 213333_at   | 3.47E-04 | 0.4537 | MDH2                 | MALATE DEHYDROGENASE 2, NAD (MITOCHONDRIAL)                               |
| 40472_at    | 8.87E-04 | 0.4545 | AGPAT7               | 1-ACYLGLYCEROL-3-PHOSPHATE O-ACYLTRANSFERASE 7 (LYSOPHOSPHATIDIC ACID ... |
| 214822_at   | 5.60E-04 | 0.4549 | FAM5B                | FAMILY WITH SEQUENCE SIMILARITY 5, MEMBER B                               |
| 209794_at   | 2.81E-04 | 0.4586 | SRGAP3               | SLIT-ROBO RHO GTPASE ACTIVATING PROTEIN 3                                 |
| 210404_x_at | 7.20E-04 | 0.4593 | CAMK2B               | CALCIUM/CALMODULIN-DEPENDENT PROTEIN KINASE (CAM KINASE) II BETA          |
| 213676_at   | 9.83E-04 | 0.4593 | RP11-444E17.5/AA RSL | ALANYL-TRNA SYNTHETASE LIKE                                               |
| 206906_at   | 4.39E-06 | 0.4599 | ICAM5                | INTERCELLULAR ADHESION MOLECULE 5, TELENCEPHALIN                          |
| 213726_x_at | 9.14E-05 | 0.4606 | TUBB2C               | TUBULIN, BETA 2C                                                          |
| 221933_at   | 2.49E-04 | 0.4608 | NLGN4X               | NEUROLIGIN 4, X-LINKED                                                    |
| 202191_s_at | 1.23E-04 | 0.4609 | GAS7                 | GROWTH ARREST-SPECIFIC 7                                                  |
| 219637_at   | 4.19E-04 | 0.4619 | ARMC9                | HYPOTHETICAL PROTEIN FLJ23510                                             |
| 218657_at   | 1.70E-04 | 0.4625 | RAPGEFL1             | RAP GUANINE NUCLEOTIDE EXCHANGE FACTOR (GEF)-LIKE 1                       |
| 203111_s_at | 5.09E-04 | 0.4627 | PTK2B                | PTK2B PROTEIN TYROSINE KINASE 2 BETA                                      |
| 214306_at   | 5.65E-04 | 0.4628 | OPA1                 | OPTIC ATROPHY 1 (AUTOSOMAL DOMINANT)                                      |
| 214655_at   | 1.94E-04 | 0.4640 | GPR6                 | G PROTEIN-COUPLED RECEPTOR 6                                              |
| 212611_at   | 7.31E-04 | 0.4643 | DTX4                 | DELTEX 4 HOMOLOG (DROSOPHILA)                                             |
| 209205_s_at | 9.13E-04 | 0.4647 | LMO4                 | LIM DOMAIN ONLY 4                                                         |
| 204505_s_at | 5.81E-04 | 0.4657 | EPB49                | ERYTHROCYTE MEMBRANE PROTEIN BAND 4.9 (DEMATEIN)                          |
| 202279_at   | 6.65E-04 | 0.4657 | C14ORF2              | CHROMOSOME 14 OPEN READING FRAME 2                                        |
| 203864_s_at | 3.04E-04 | 0.4662 | ACTN2                | ACTININ, ALPHA 2                                                          |
| 202457_s_at | 7.10E-05 | 0.4663 | PPP3CA               | PROTEIN PHOSPHATASE 3 (FORMERLY 2B), CATALYTIC SUBUNIT, ALPHA ISOFORM ... |
| 47560_at    | 4.75E-04 | 0.4679 | LPHN1                | LATROPHILIN 1                                                             |
| 211006_s_at | 1.92E-05 | 0.4683 | KCNB1                | POTASSIUM VOLTAGE-GATED CHANNEL, SHAB-RELATED SUBFAMILY, MEMBER 1         |
| 204604_at   | 6.38E-04 | 0.4687 | PFTK1                | PFTAIRE PROTEIN KINASE 1                                                  |
| 206342_x_at | 1.19E-04 | 0.4701 | IDS                  | IDURONATE 2-SULFATASE (HUNTER SYNDROME)                                   |
| 201972_at   | 3.11E-04 | 0.4709 | ATP6V1A              | ATPASE, H+ TRANSPORTING, LYSOSOMAL 70KDA, V1 SUBUNIT A                    |
| 209281_s_at | 3.04E-04 | 0.4713 | ATP2B1               | ATPASE, CA++ TRANSPORTING, PLASMA MEMBRANE 1                              |
| 213242_x_at | 2.30E-04 | 0.4721 | KIAA0284             | KIAA0284                                                                  |
| 212727_at   | 2.92E-04 | 0.4723 | DLG3                 | DISCS, LARGE HOMOLOG 3 (NEUROENDOCRINE-DLG, DROSOPHILA)                   |
| 212383_at   | 9.27E-06 | 0.4728 | ATP6V0A1             | ATPASE, H+ TRANSPORTING, LYSOSOMAL V0 SUBUNIT A1                          |
| 201557_at   | 3.15E-04 | 0.4731 | VAMP2                | VESICLE-ASSOCIATED MEMBRANE PROTEIN 2 (SYNAPTOBREVIN 2)                   |

|             |          |        |          |                                                                            |
|-------------|----------|--------|----------|----------------------------------------------------------------------------|
| 219668_at   | 1.45E-04 | 0.4734 | GDAP1L1  | GANGLIOSIDE-INDUCED DIFFERENTIATION-ASSOCIATED PROTEIN 1-LIKE 1            |
| 216184_s_at | 3.43E-04 | 0.4745 | RIMS1    | REGULATING SYNAPTIC MEMBRANE EXOCYTOSIS 1                                  |
| 219005_at   | 5.50E-04 | 0.4752 | C19ORF4  | CHROMOSOME 19 OPEN READING FRAME 4                                         |
| 212646_at   | 7.96E-04 | 0.4755 | RAFTLIN  | RAFT-LINKING PROTEIN                                                       |
| 205807_s_at | 6.58E-05 | 0.4758 | TUFT1    | TUFTELIN 1                                                                 |
| 212880_at   | 1.51E-04 | 0.4763 | WDR7     | WD REPEAT DOMAIN 7                                                         |
| 215423_at   | 2.90E-04 | 0.4767 | NA       | .CONSENSUS INCLUDES GB:U52827.1 /DEF=HOMO SAPIENS CRI-DU-CHAT REGION M     |
| 209871_s_at | 4.06E-04 | 0.4768 | APBA2    | AMYLOID BETA (A4) PRECURSOR PROTEIN-BINDING, FAMILY A, MEMBER 2 (X11-L...  |
| 213186_at   | 8.28E-04 | 0.4769 | DZIP3    | ZINC FINGER DAZ INTERACTING PROTEIN 3                                      |
| 201082_s_at | 9.20E-04 | 0.4771 | DCTN1    | DYNACTIN 1 (P150, GLUED HOMOLOG, DROSOPHILA)                               |
| 213055_at   | 5.90E-05 | 0.4775 | CD47     | CD47 ANTIGEN (RH-RELATED ANTIGEN, INTEGRIN-ASSOCIATED SIGNAL TRANSDUCE...  |
| 219170_at   | 2.77E-04 | 0.4778 | FSD1     | FIBRONECTIN TYPE III AND SPRY DOMAIN CONTAINING 1                          |
| 202254_at   | 9.31E-05 | 0.4807 | SIPA1L1  | SIGNAL-INDUCED PROLIFERATION-ASSOCIATED 1 LIKE 1                           |
| 213421_x_at | 2.48E-04 | 0.4812 | PRSS3    | PROTEASE, SERINE, 3 (MESOTRYPSIN)                                          |
| 217841_s_at | 2.84E-04 | 0.4835 | PPME1    | PROTEIN PHOSPHATASE METHYLESTERASE 1                                       |
| 206888_s_at | 2.94E-04 | 0.4844 | ARHGDIG  | RHO GDP DISSOCIATION INHIBITOR (GDI) GAMMA                                 |
| 213834_at   | 3.75E-04 | 0.4846 | IQSEC3   | IQ MOTIF AND SEC7 DOMAIN 3                                                 |
| 204735_at   | 1.71E-04 | 0.4854 | PDE4A    | PHOSPHODIESTERASE 4A, CAMP-SPECIFIC (PHOSPHODIESTERASE E2 DUNCE HOMOLO...  |
| 209914_s_at | 6.09E-04 | 0.4857 | NRXN1    | NEUREXIN 1                                                                 |
| 212703_at   | 2.25E-04 | 0.4858 | TLN2     | TALIN 2                                                                    |
| 213276_at   | 7.06E-05 | 0.4866 | CAMK2B   | CALCIUM/CALMODULIN-DEPENDENT PROTEIN KINASE (CAM KINASE) II BETA           |
| 218597_s_at | 2.38E-04 | 0.4867 | C10ORF70 | CHROMOSOME 10 OPEN READING FRAME 70                                        |
| 215321_at   | 3.10E-04 | 0.4871 | RPIB9    | RAP2-BINDING PROTEIN 9                                                     |
| 213832_at   | 8.50E-04 | 0.4876 | NA       | .CONSENSUS INCLUDES GB:AA530995 /FEA=EST /DB_XREF=GI:2273701 /DB_XREF=     |
| 212736_at   | 4.44E-04 | 0.4882 | C16ORF45 | CHROMOSOME 16 OPEN READING FRAME 45                                        |
| 218539_at   | 2.04E-04 | 0.4892 | FBXO34   | F-BOX PROTEIN 34                                                           |
| 205722_s_at | 2.10E-04 | 0.4894 | GFRA2    | GDNF FAMILY RECEPTOR ALPHA 2                                               |
| 214668_at   | 1.61E-04 | 0.4899 | C13ORF1  | CHROMOSOME 13 OPEN READING FRAME 1                                         |
| 212223_at   | 4.28E-04 | 0.4910 | IDS      | IDURONATE 2-SULFATASE (HUNTER SYNDROME)                                    |
| 207753_at   | 4.32E-04 | 0.4911 | ZNF304   | ZINC FINGER PROTEIN 304                                                    |
| 201561_s_at | 3.94E-05 | 0.4937 | CLSTN1   | CALSYNTENIN 1                                                              |
| 219288_at   | 3.45E-04 | 0.4943 | C3ORF14  | CHROMOSOME 3 OPEN READING FRAME 14                                         |
| 208732_at   | 4.06E-04 | 0.4947 | RAB2     | RAB2, MEMBER RAS ONCOGENE FAMILY                                           |
| 204763_s_at | 9.48E-05 | 0.4955 | GNAO1    | GUANINE NUCLEOTIDE BINDING PROTEIN (G PROTEIN), ALPHA ACTIVATING ACTIV...  |
| 218906_x_at | 2.34E-04 | 0.4969 | KLC2     | KINESIN LIGHT CHAIN 2                                                      |
| 209793_at   | 7.30E-04 | 0.4977 | GRIA1    | GLUTAMATE RECEPTOR, IONOTROPIC, AMPA 1                                     |
| 207227_x_at | 3.87E-04 | 0.4988 | RFPL2    | RET FINGER PROTEIN-LIKE 2                                                  |
| 201433_s_at | 9.78E-04 | 0.4990 | PTDSS1   | PHOSPHATIDYLSERINE SYNTHASE 1                                              |
| 217897_at   | 4.62E-04 | 0.4990 | FXYP6    | FXYP DOMAIN CONTAINING ION TRANSPORT REGULATOR 6                           |
| 214848_at   | 2.02E-04 | 0.4994 | YWHAZ    | TYROSINE 3-MONOOXYGENASE/TRYPHTOPHAN 5-MONOOXYGENASE ACTIVATION PROTEIN... |
| 207556_s_at | 6.49E-04 | 0.4997 | DGKZ     | DIACYLGLYCEROL KINASE, ZETA 104KDA                                         |

6 FTL-D-U cases with progranulin gene abnormalities (*GRN*+ FTL-D-U) were compared to 8 normal controls on Affymetrix U133A microarrays. A statistical cutoff of  $p < 0.001$  was used to identify genes with differential expression, which were then ranked based on fold change (FC, disease/normal). All genes with fold change  $> 2$ , identified by GeneSymbol and name, are shown for frontal cortex samples.

**Supplementary Table 4. More mRNA transcripts are differentially expressed between *GRN+* and *GRN-* FTLD-U brain than between *GRN-* FTLD-U brain and control.**

|                                                                    | Samples  | Overall probes | Increased in <i>GRN-</i> FTLD-U | Decreased in <i>GRN-</i> FTLD-U | FDR   |
|--------------------------------------------------------------------|----------|----------------|---------------------------------|---------------------------------|-------|
| <i>GRN+</i> FTLD-U vs. <i>GRN-</i> FTLD-U<br><i>Frontal cortex</i> | 6 vs. 10 | 208 (89)       | 140 (78)                        | 68 (11)                         | 12.5% |
| <i>GRN-</i> FTLD-U vs. Normal<br><i>Frontal cortex</i>             | 10 vs. 8 | 154 (40)       | 94 (33)                         | 60 (7)                          | 13.8% |

Numbers reflect probe sets with differential expression (Overall probes), increased expression in *GRN-* FTLD-U (Increased in *GRN-* FTLD-U) or decreased expression in *GRN-* FTLD-U (Decreased in *GRN-* FTLD-U) at  $p < 0.001$ . The total number meeting this statistical threshold is shown, while the number of probes meeting both a  $p < 0.001$  criterion and fold change  $> 2$  criterion appears in parentheses.

FDR = false discovery rate. Determined by class permutation analysis (similar results were obtained with calculations based on nominal P-value).

*GRN+* FTLD-U = FTLD-U cases with progranulin gene abnormalities

*GRN-* FTLD-U = FTLD-U cases without progranulin gene abnormalities.

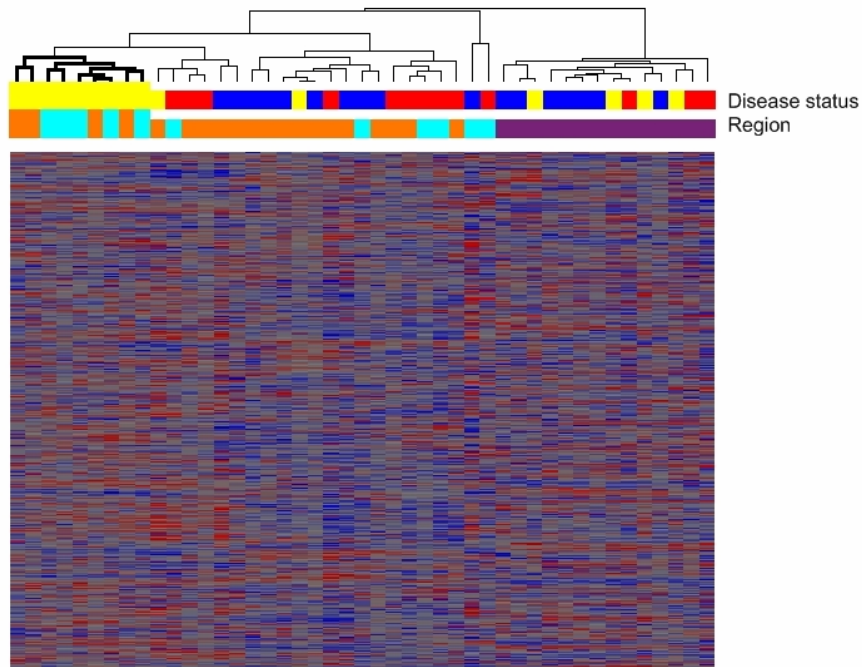

**Supplementary Figure 1.**

Hierarchical dendrogram produced by clustering of expression levels for 45 brain samples (columns) and 22,277 transcripts (rows), using Spearman correlation coefficients. In this analysis, only Sampathu Type 3 FTLN-U cases (19) were used for analysis. As seen in previous analyses, *GRN+* FTLN-U samples (yellow) from hippocampus (teal) and frontal cortex (orange) fell into one branch (bold), indicating a global expression signature that was distinct from *GRN-* FTLN-U (red) and normal controls (blue). Also corroborating prior analyses with the full dataset, cerebellar samples (purple) had a distinct expression profile. Heatmap tiles show standardized expression levels of individual genes with red denoting high expression, grey denoting medium expression, and blue denoting low expression levels.

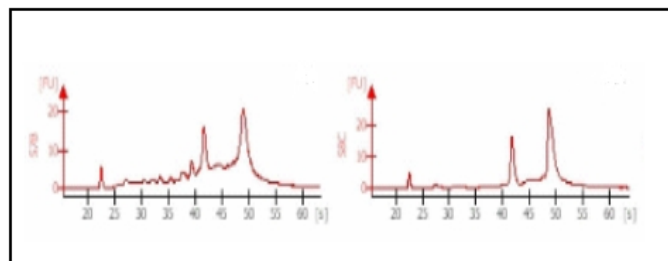

**Supplementary Figure 2.**

Shown are representative Agilent Bioanalyzer traces of RNA samples ranging from worst quality (left) to best quality (right). All samples used had a 260/280 ratio of  $>1.9$ , with sharp ribosomal RNA peaks, virtually undetectable low molecular weight RNA, and RIN numbers  $>8$ .

**Supplementary Table 5. Primers used for quantitative reverse transcription PCR (QRT-PCR).**

| <b>Gene Name</b>                         | <b>Applied Biosystems Product ID</b> | <b>NCBI Reference Sequence</b> | <b>Exon Boundary</b> | <b>Assay Location</b> | <b>Amplicon Length</b> |
|------------------------------------------|--------------------------------------|--------------------------------|----------------------|-----------------------|------------------------|
| Glycine receptor beta subunit (GLRB)     | Hs00168151_m1                        | <u>NM_000824.2</u>             | 8-9                  | 1046                  | 54                     |
| Metabotropic glutamate receptor 5 (GRM5) | Hs00168275_m1                        | <u>NM_000842.1</u>             | 6-7                  | 1838                  | 80                     |
| Histone deacetylase 1 (HDAC1)            | Hs00606262_g1                        | <u>NM_004964.2</u>             | 12-13                | 1436                  | 149                    |
| Heat shock protein 2 70kD (HSPA2)        | Hs00356607_g1                        | <u>NM_021979.2</u>             | 2-2                  | 1252                  | 74                     |
| Serotonin receptor 2A (HTR2A)            | Hs00167241_m1                        | <u>NM_000621.2</u>             | 1-2                  | 546                   | 77                     |
| Inhibitor of DNA binding 4 (ID4)         | Hs00155465_m1                        | <u>NM_001546.2</u>             | 1-2                  | 810                   | 54                     |
| Notch homolog (Drosophila) 2 (NOTCH2)    | Hs00225747_m1                        | <u>NM_024408.2</u>             | 23-24                | 4153                  | 73                     |
| TAR DNA binding protein 43 (TDP-43)      | Hs00540114_s1                        | <u>NM_007375.3</u>             | 6-6                  | 3369                  | 76                     |
| Beta-actin (ACTB)                        | Hs03023880_g1                        | <u>NM_001101.2</u>             | 6-6                  | 1144                  | 139                    |
| Cyclophilin A (PPIA)                     | Hs99999904_m1                        | <u>NM_021130.3</u>             | 4-5                  | 435                   | 98                     |

All primers for QRT-PCR were ordered from Applied Biosystems (Taqman Gene Expression Assay System) and assessed for comparable efficiency using a standard dilution curve.
